# Supplementary material for: Cotargeting DNA topoisomerase II enhances efficacy of RAS-targeted therapy in KRAS-mutant cancer models
Source: JCI journal article supplement (doi:10.1172/jci197192), 2026-02-15
Supplement: sd2 [file 2]

Fig 1B

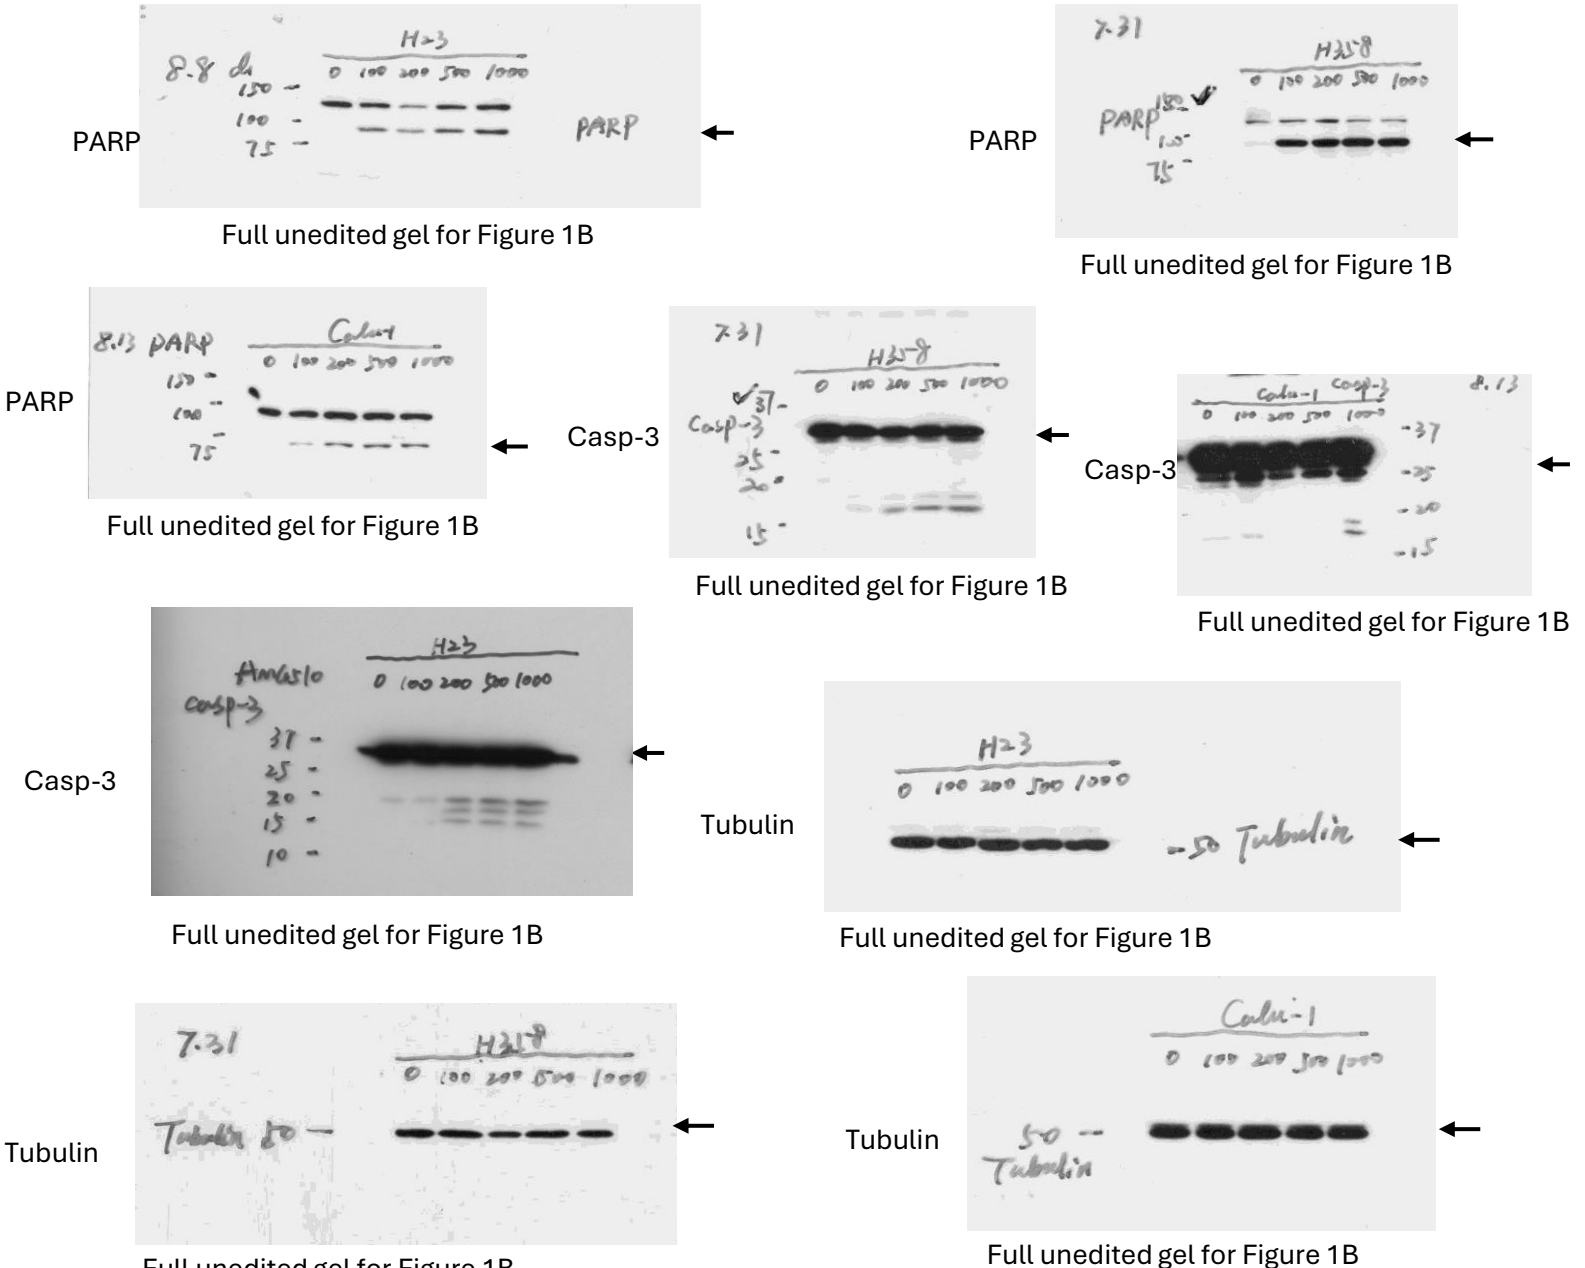

Fig 1C

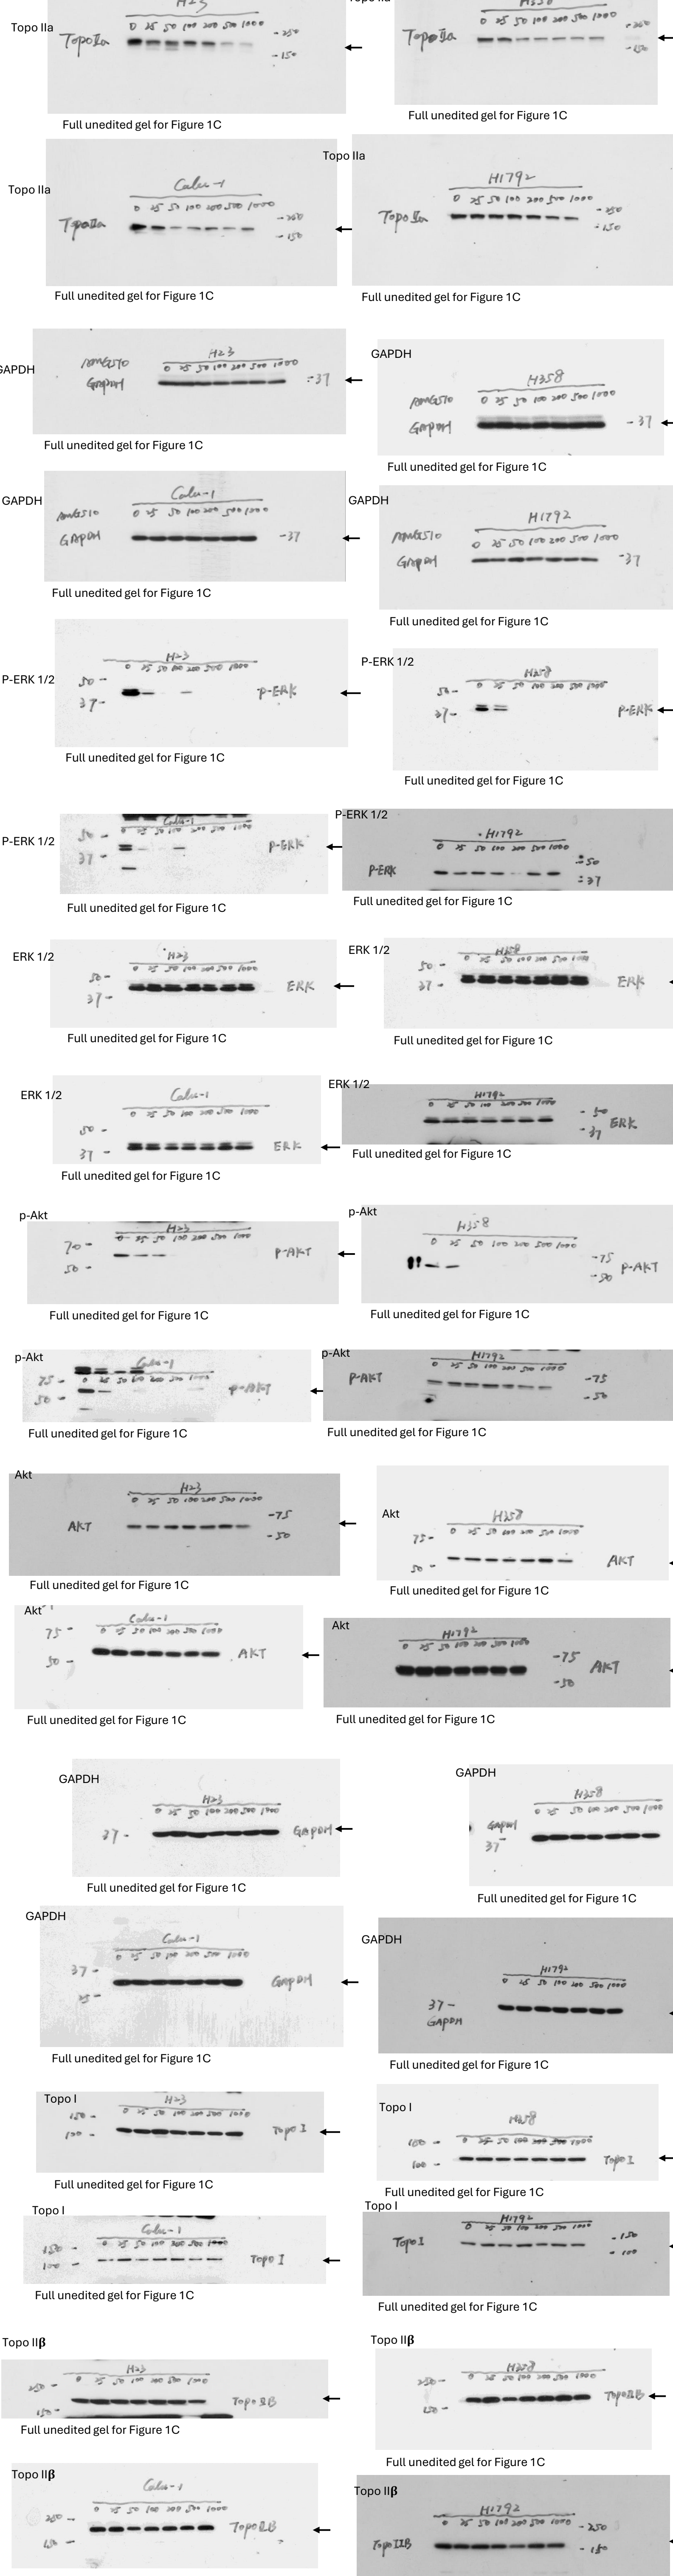

Fig 1B and C

### Fig 1D

Topo IIa

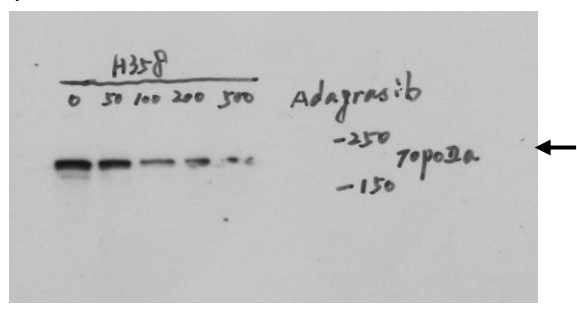

Full unedited gel for Figure 1D

Topo IIa

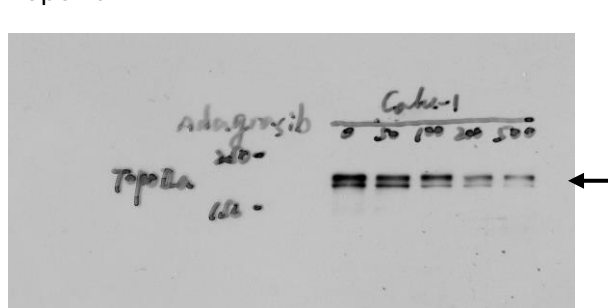

Full unedited gel for Figure 1D

P-ERK 1/2

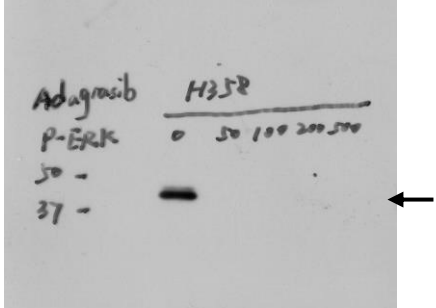

Full unedited gel for Figure 1D

P-ERK 1/2

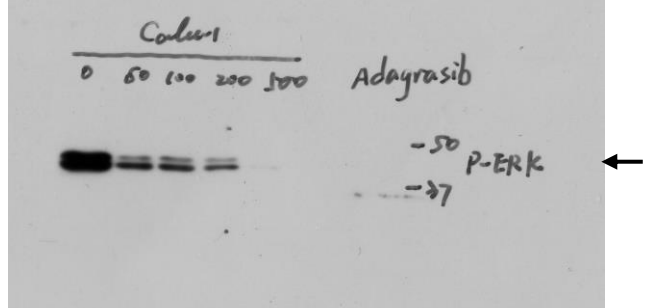

Full unedited gel for Figure 1D

ERK 1/2

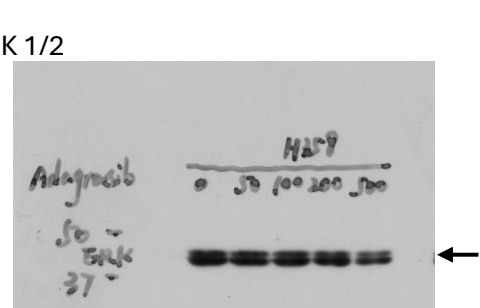

Full unedited gel for Figure 1D

ERK 1/2

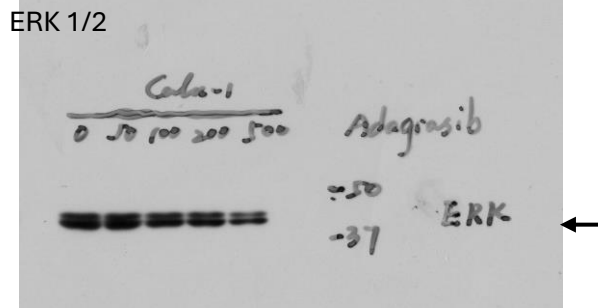

Full unedited gel for Figure 1D

p-Akt

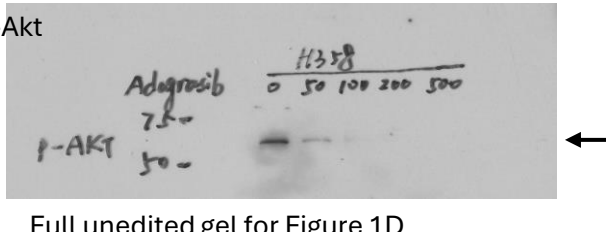

Full unedited gel for Figure 1D

p-Akt

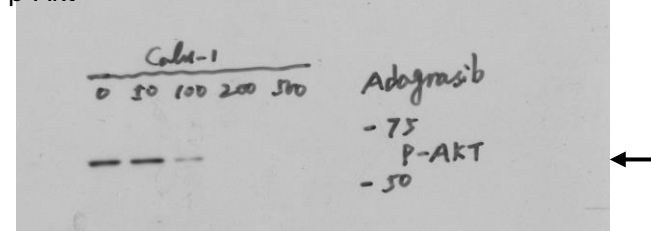

Full unedited gel for Figure 1D

Akt

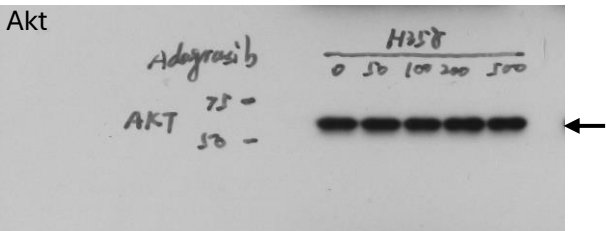

Full unedited gel for Figure 1D

Akt

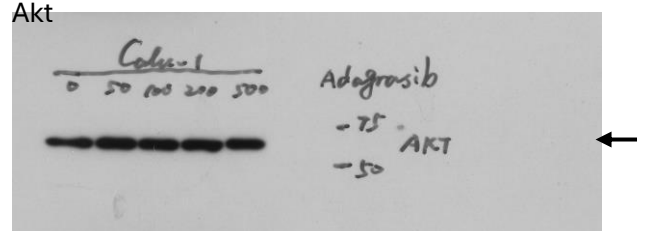

Full unedited gel for Figure 1D

Topo IIβ

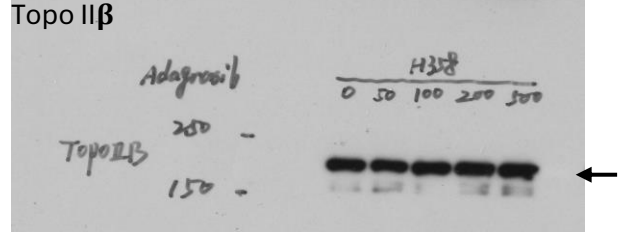

Full unedited gel for Figure 1D

Topo IIβ

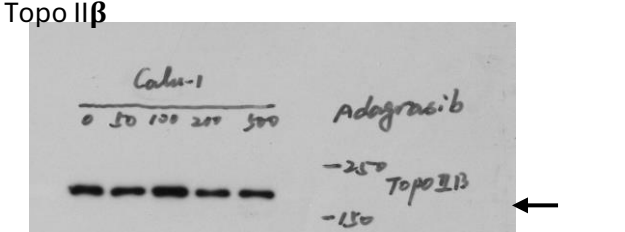

Full unedited gel for Figure 1D

Topo I

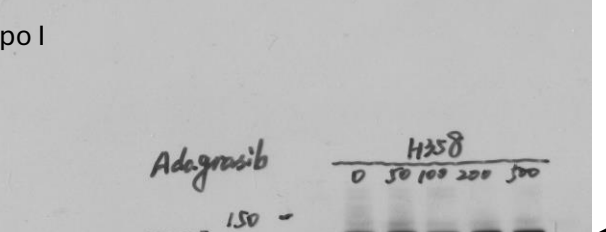

Full unedited gel for Figure 1D

Topo I

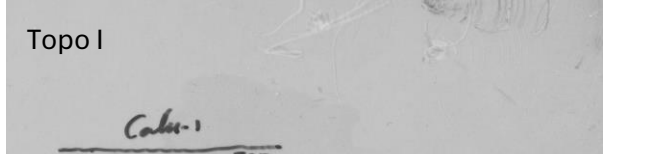

Full unedited gel for Figure 1D

Tubulin

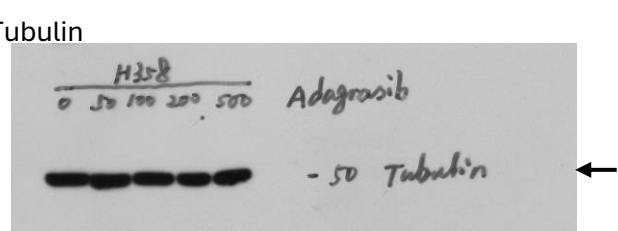

Full unedited gel for Figure 1D

Tubulin

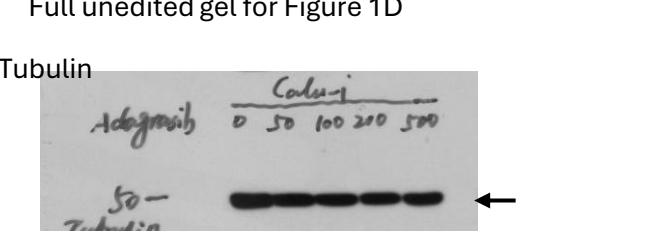

Full unedited gel for Figure 1D

### Fig 1E

Topo IIa

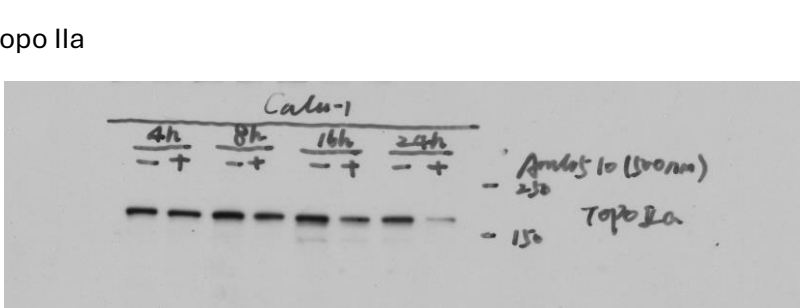

Full unedited gel for Figure 1E

GAPDH

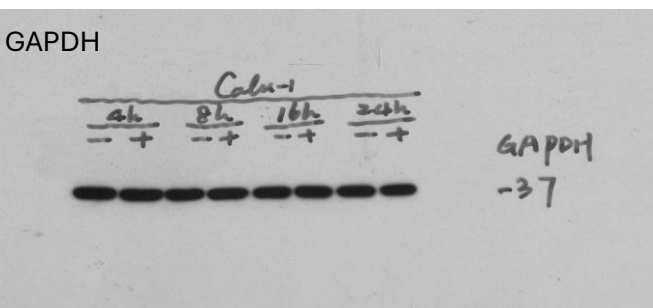

Full unedited gel for Figure 1E

Topo IIa

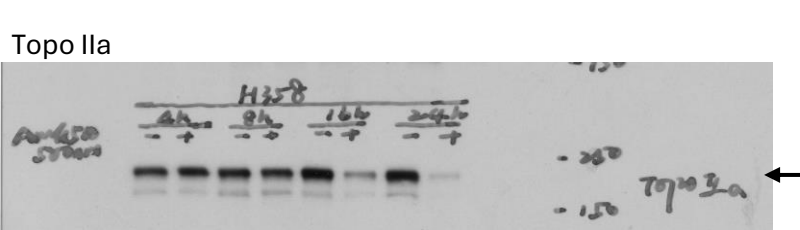

Full unedited gel for Figure 1E

GAPDH

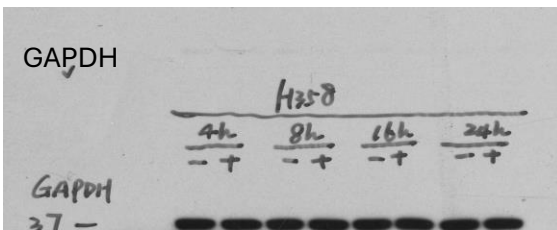

Full unedited gel for Figure 1E

### Fig 1F

Tubulin

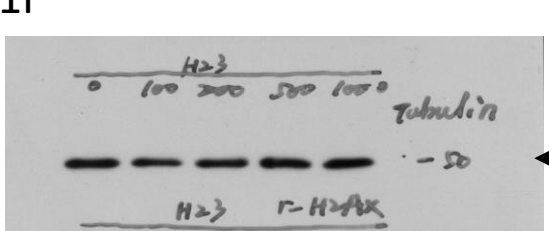

Full unedited gel for Figure 1F

γ-H2AX

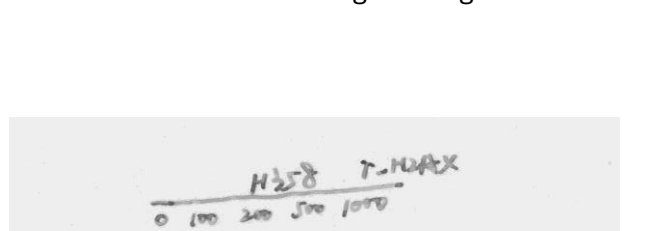

Full unedited gel for Figure 1F

γ-H2AX

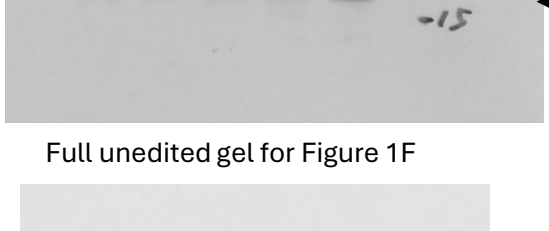

Full unedited gel for Figure 1F

γ-H2AX

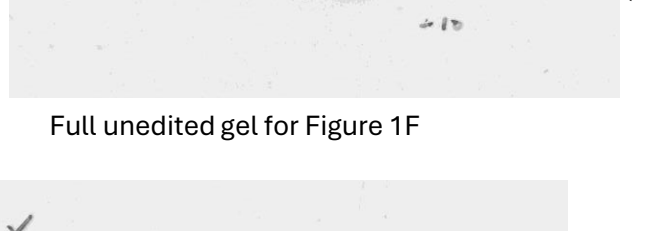

Full unedited gel for Figure 1F

Tubulin

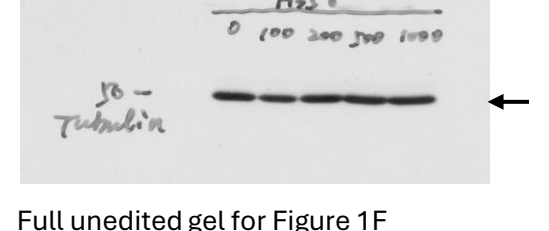

Full unedited gel for Figure 1F

γ-H2AX

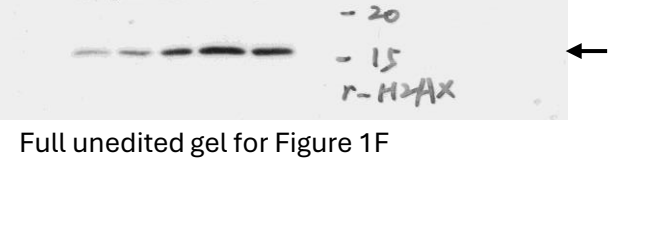

Full unedited gel for Figure 1F

Tubulin

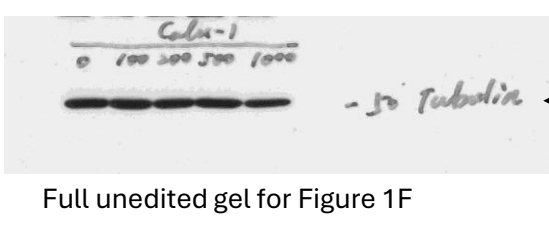

Full unedited gel for Figure 1F

### Fig 1D-F

Fig 2A

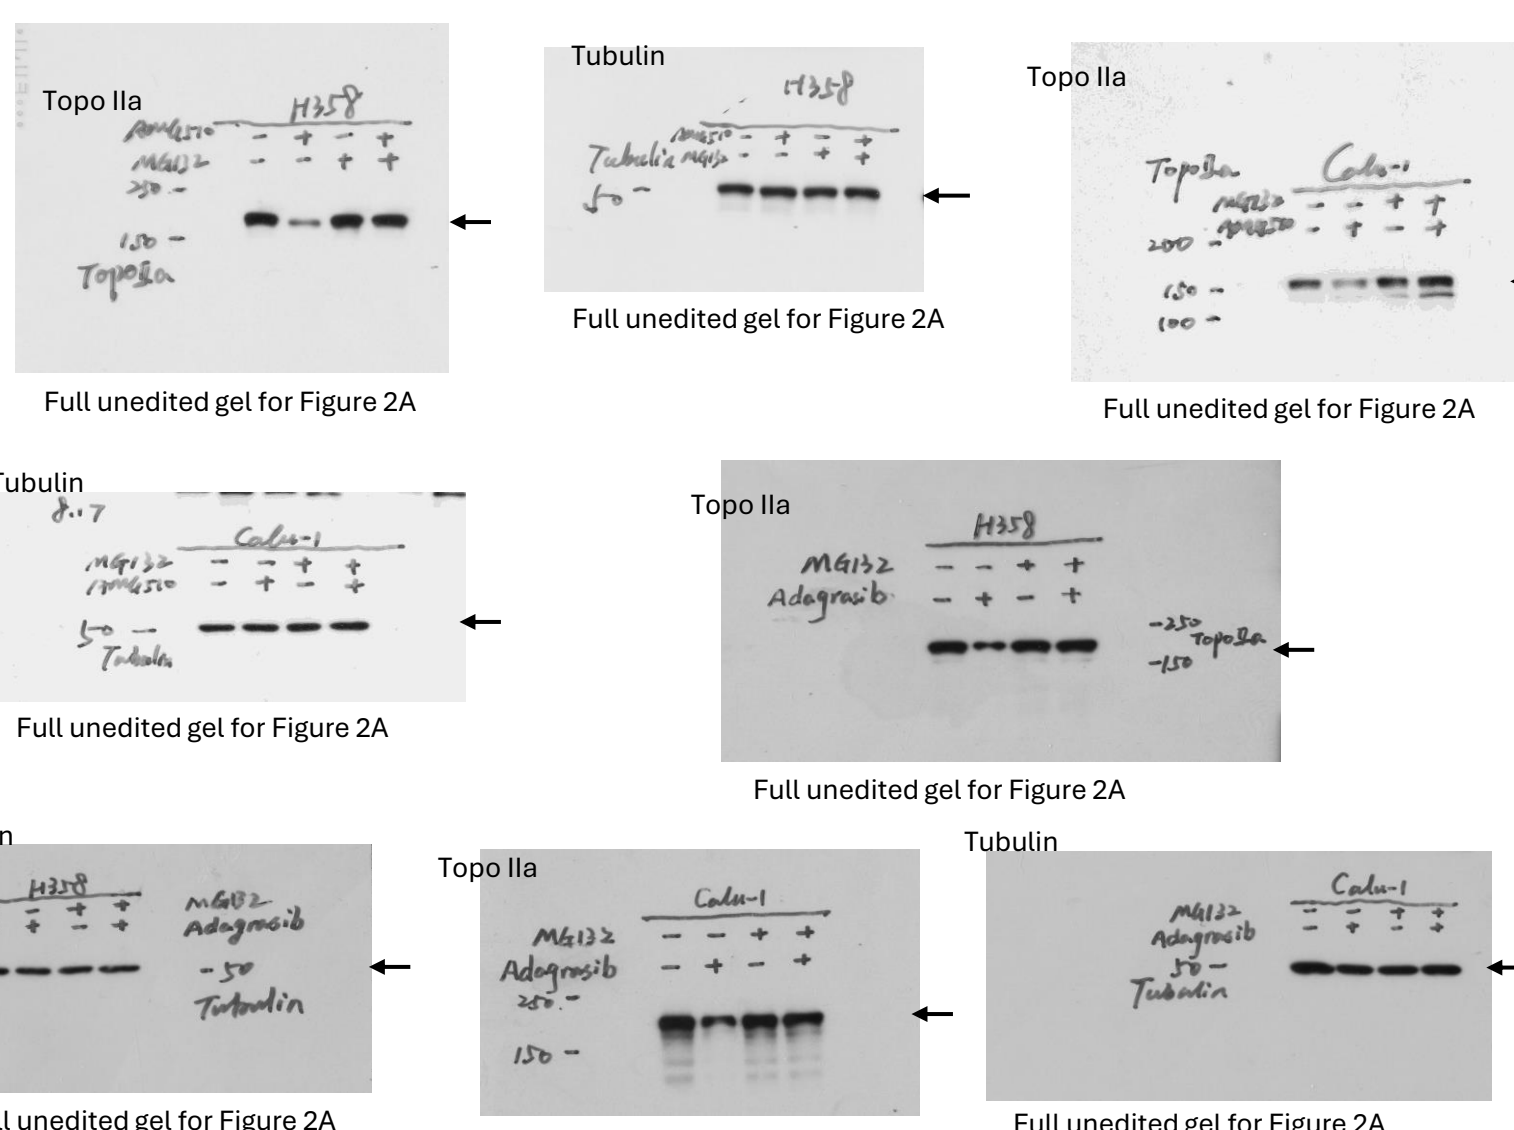

Fig 2B

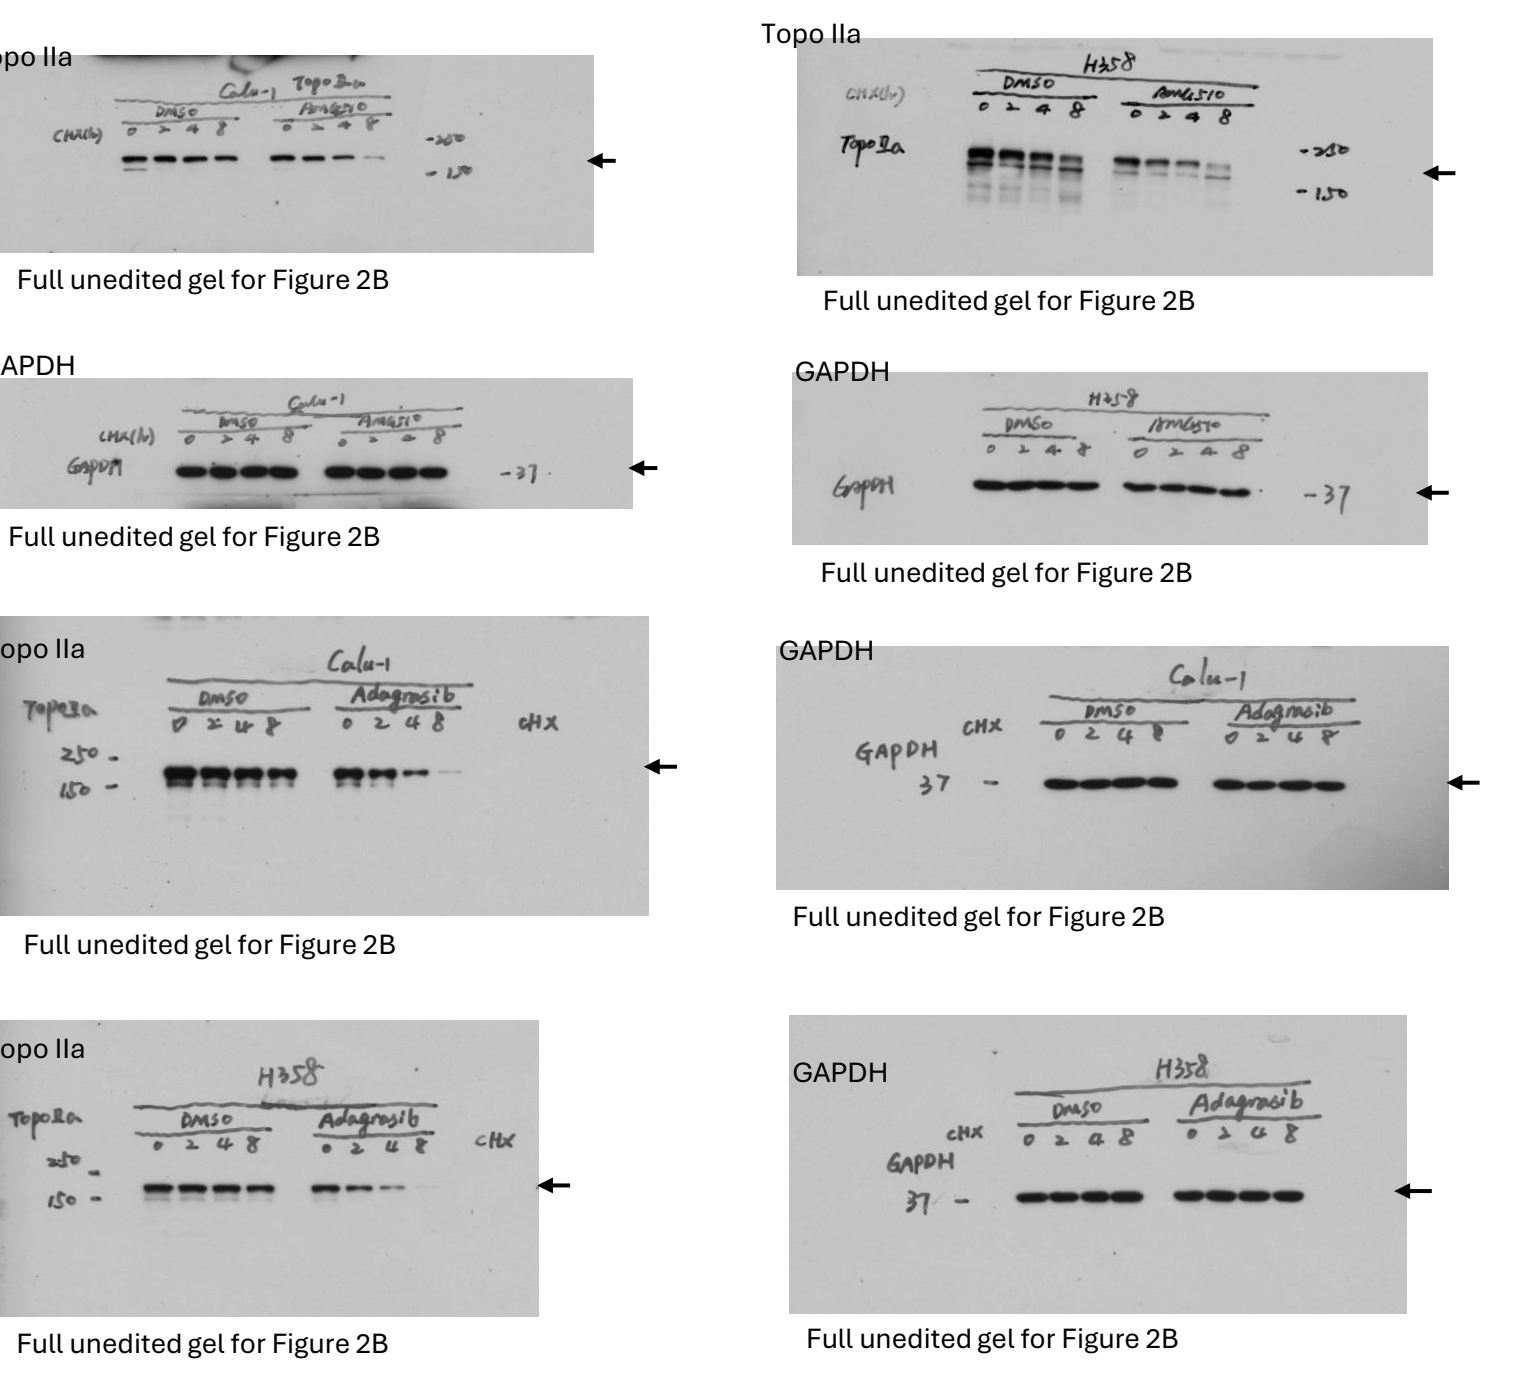

Fig 2C

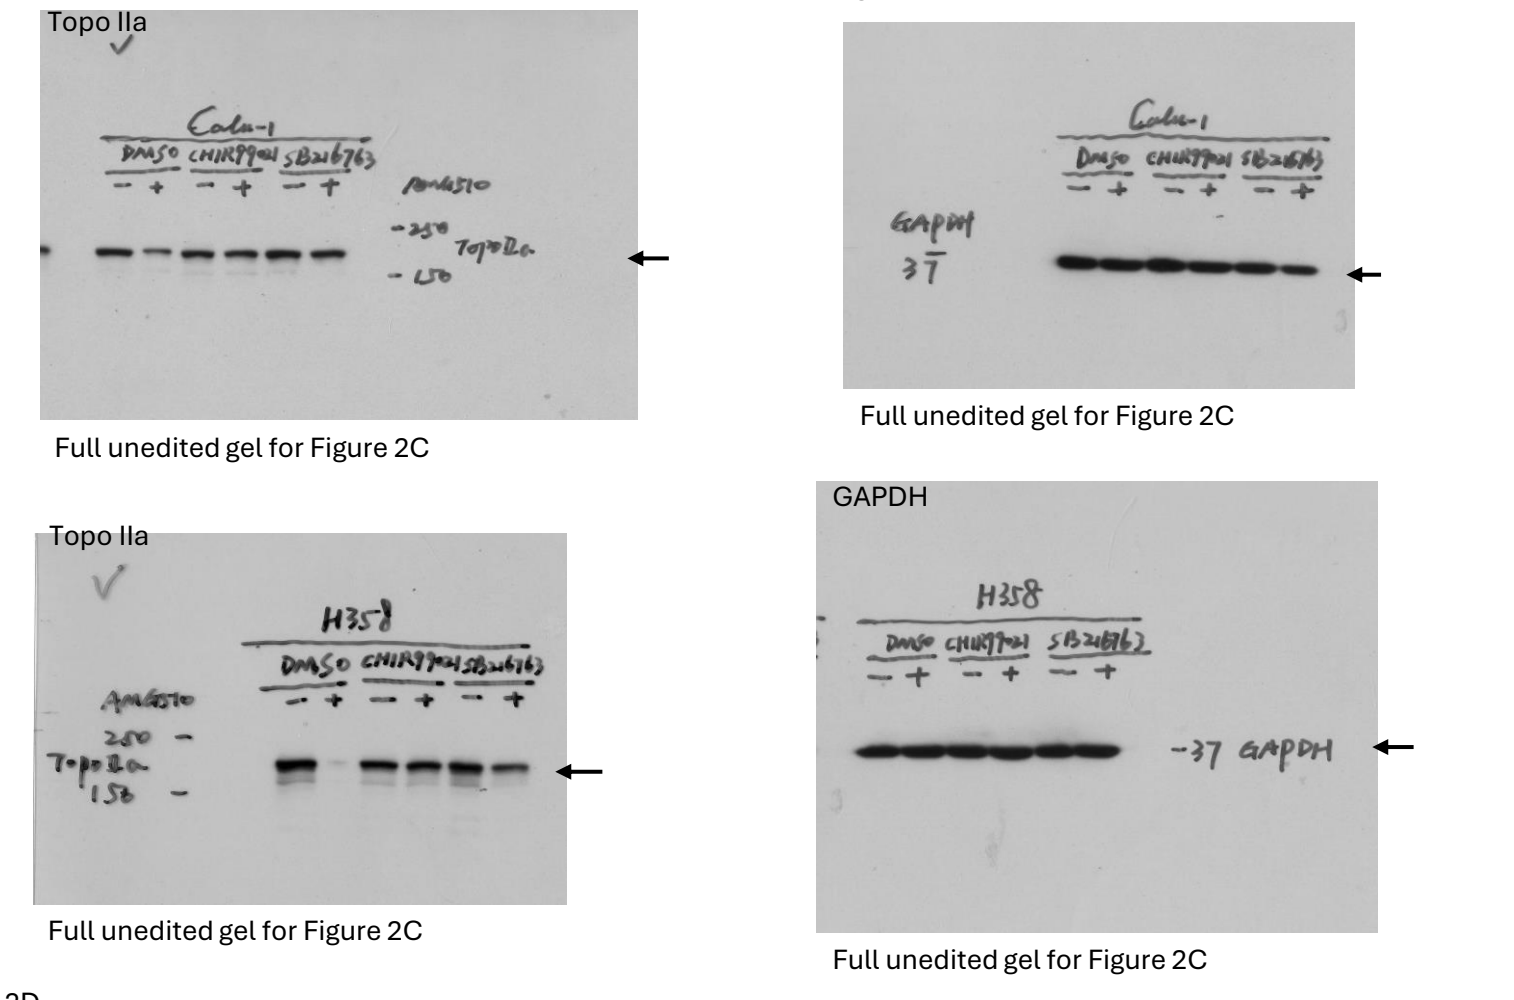

Fig 2D

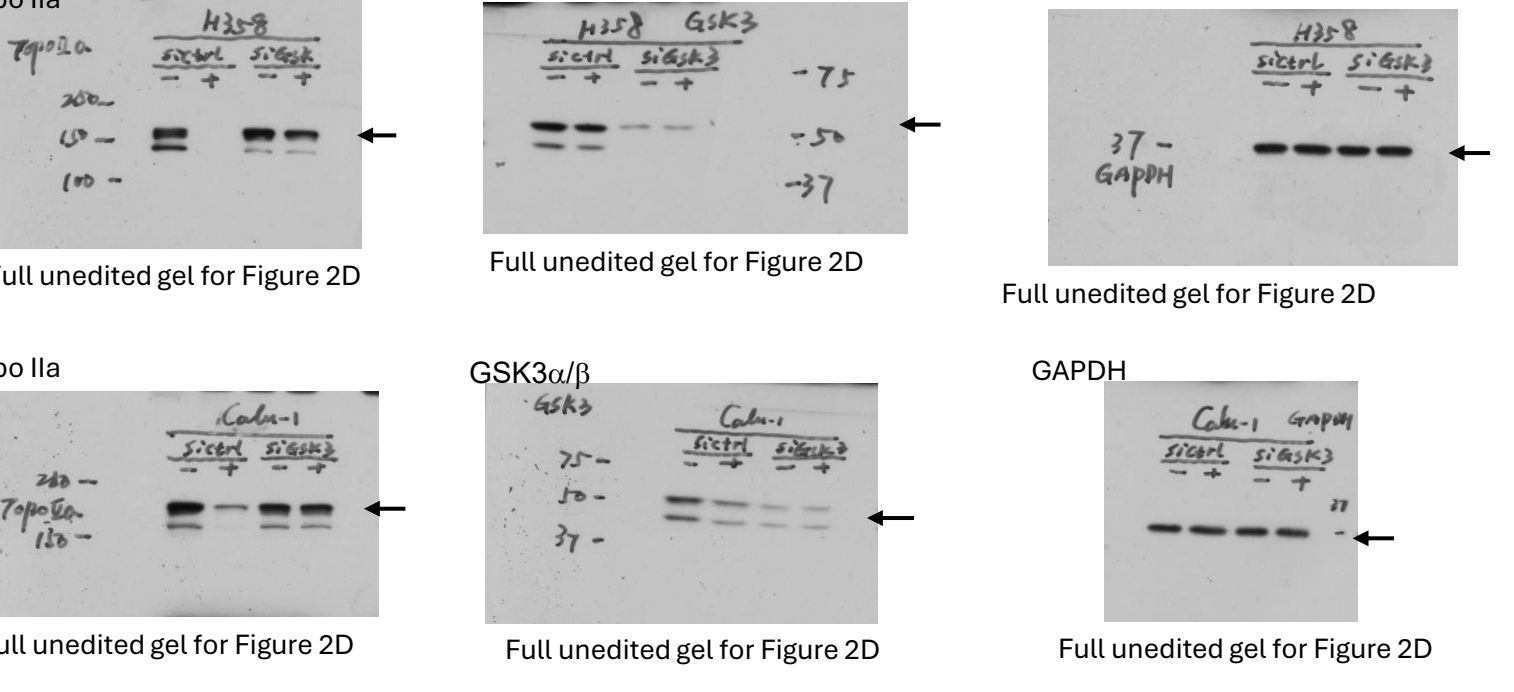

Fig 2E

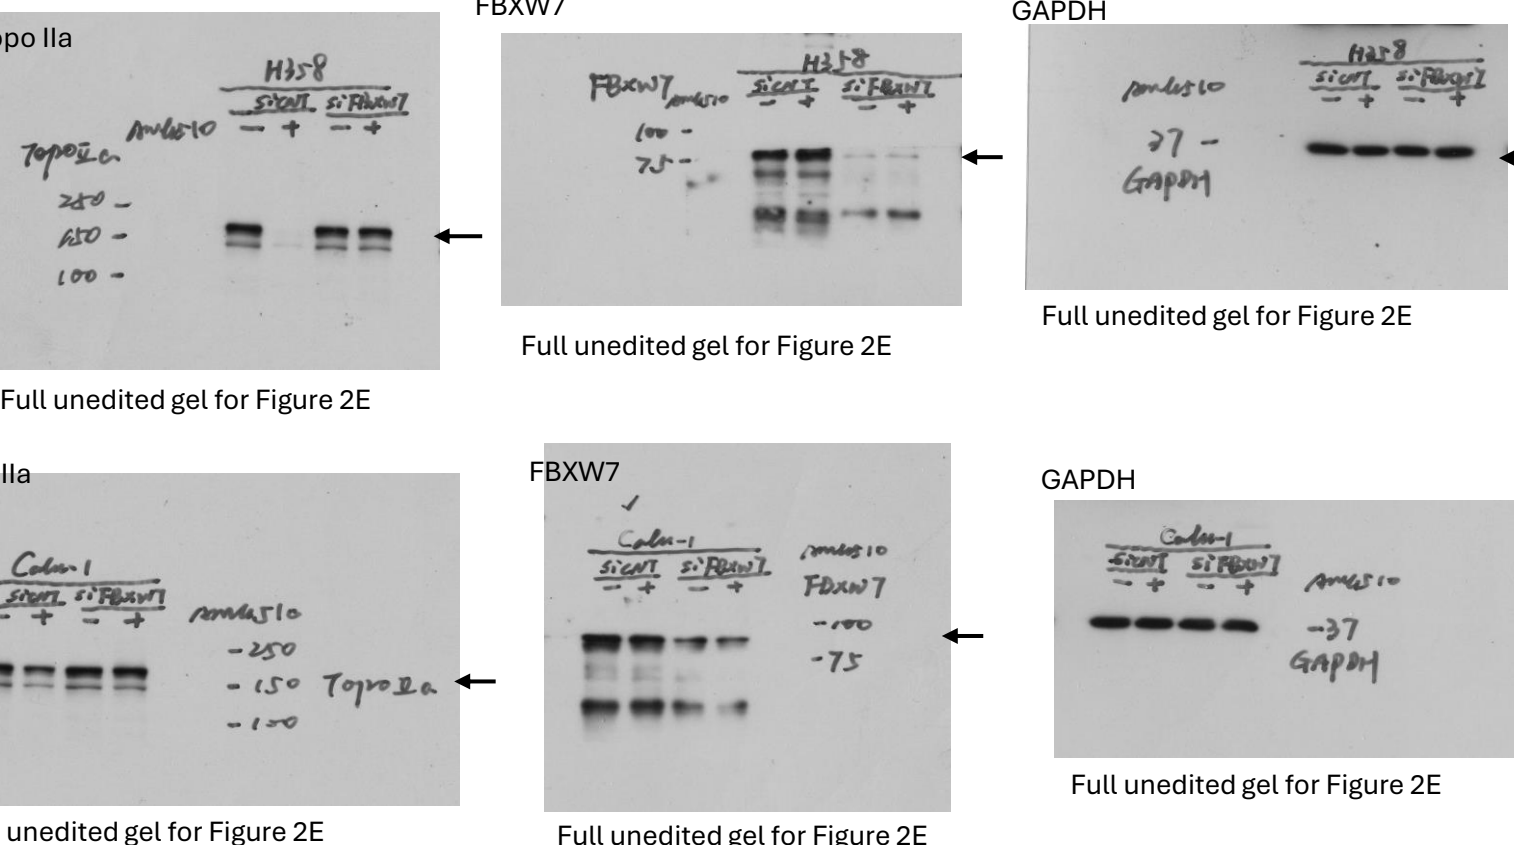

Fig 2

Fig 3A

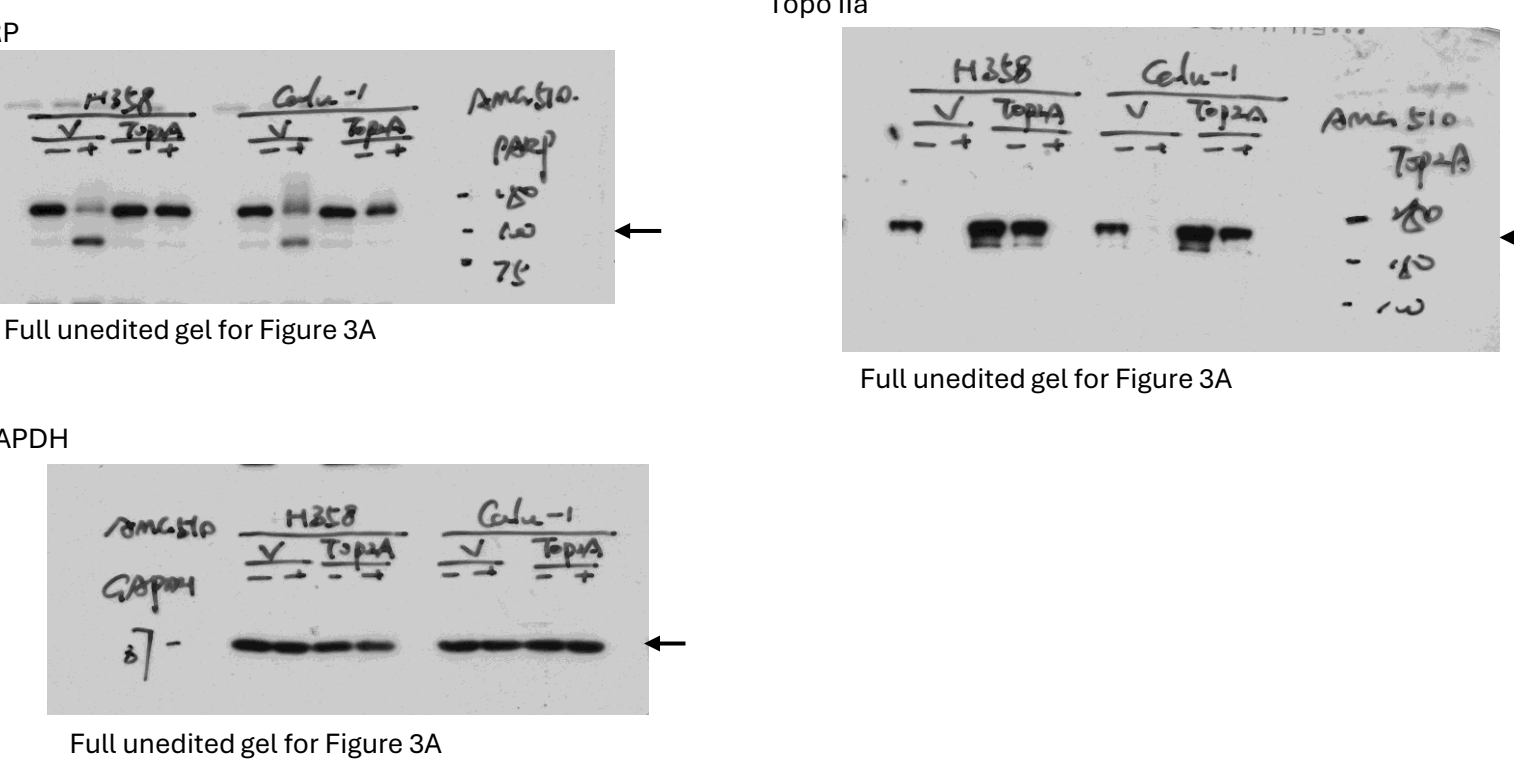

Fig 3E

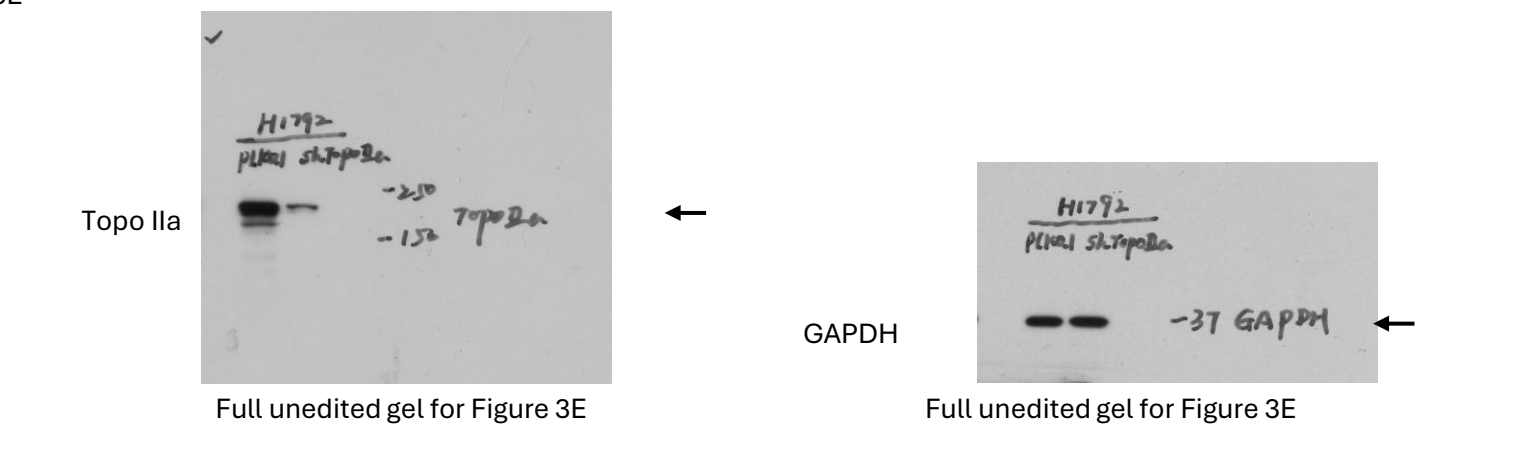

Fig 3G

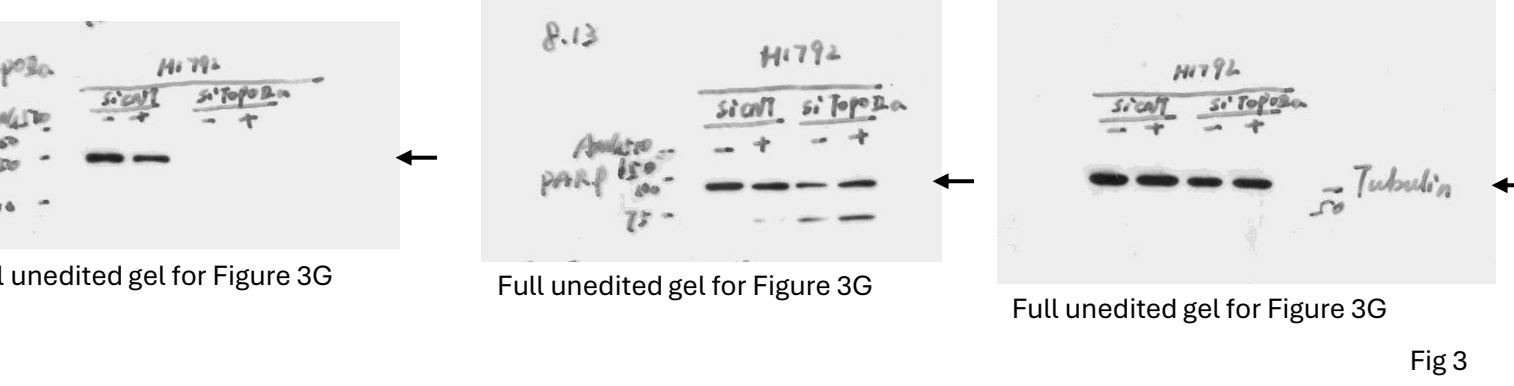

Fig 3

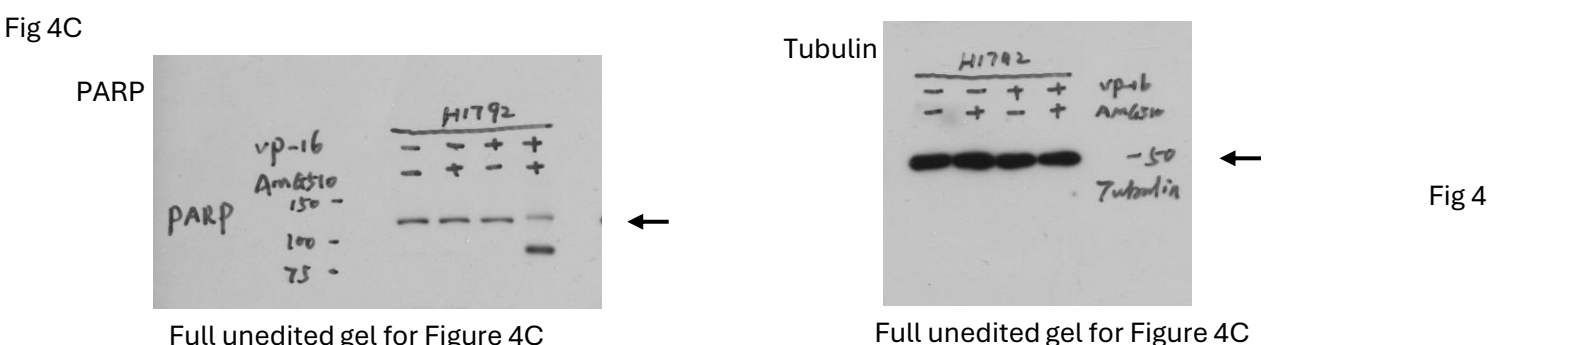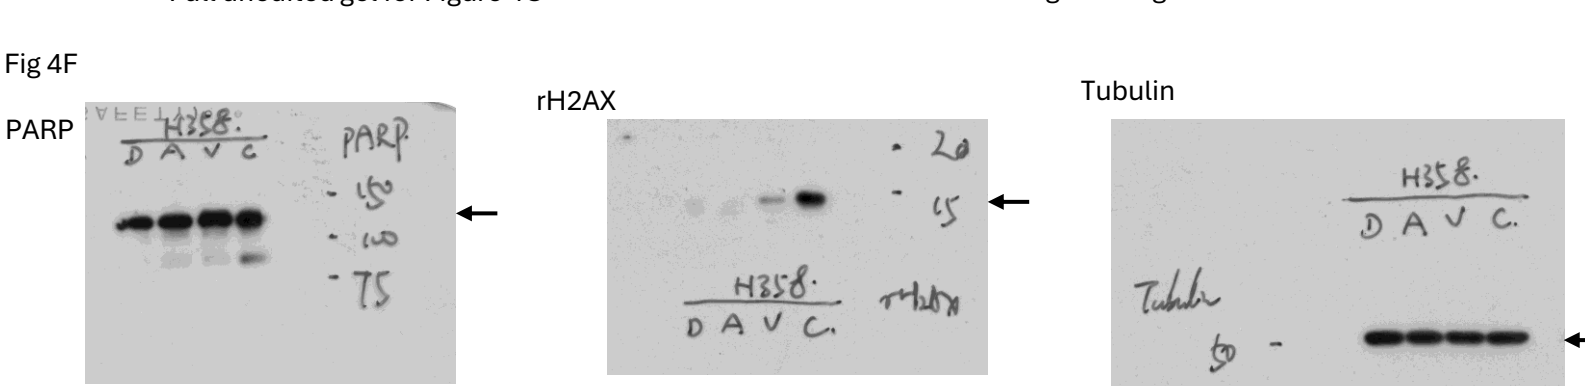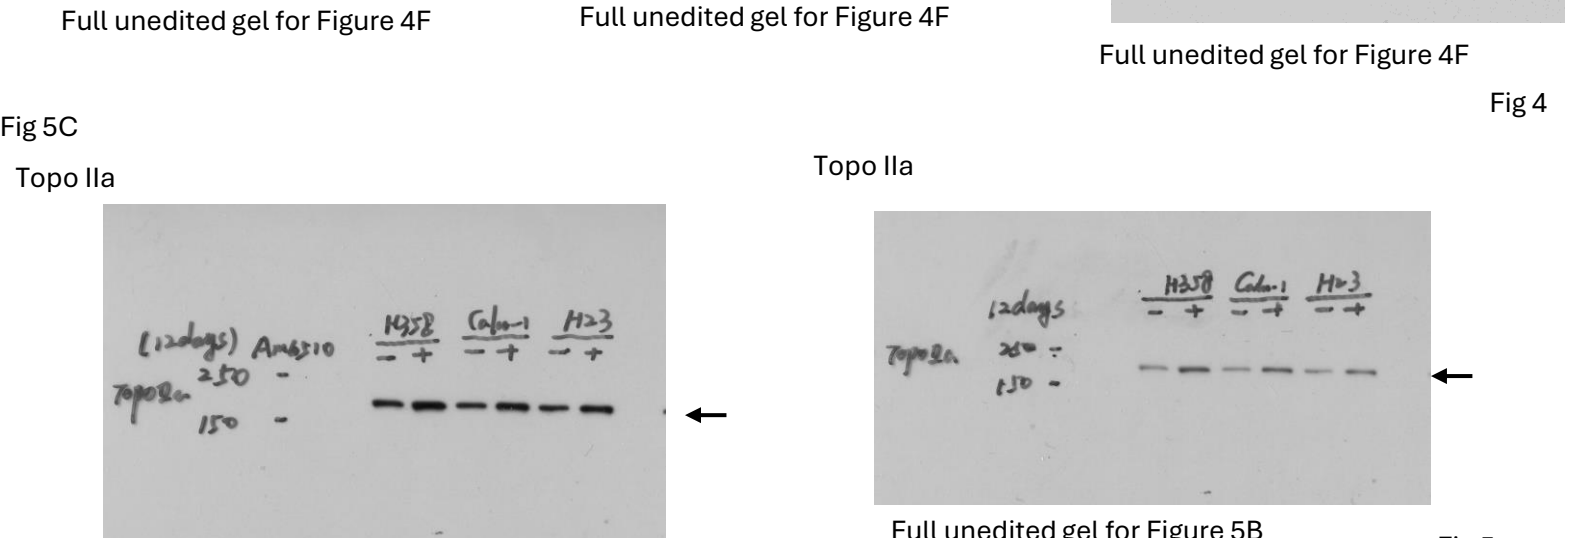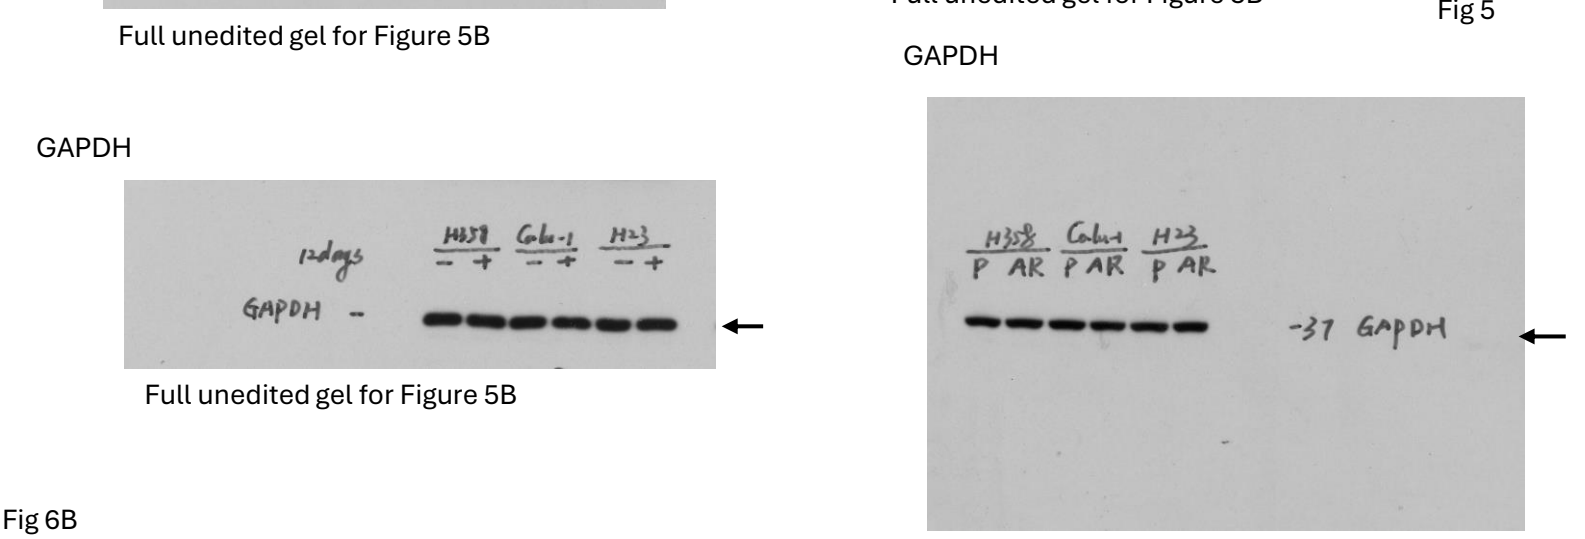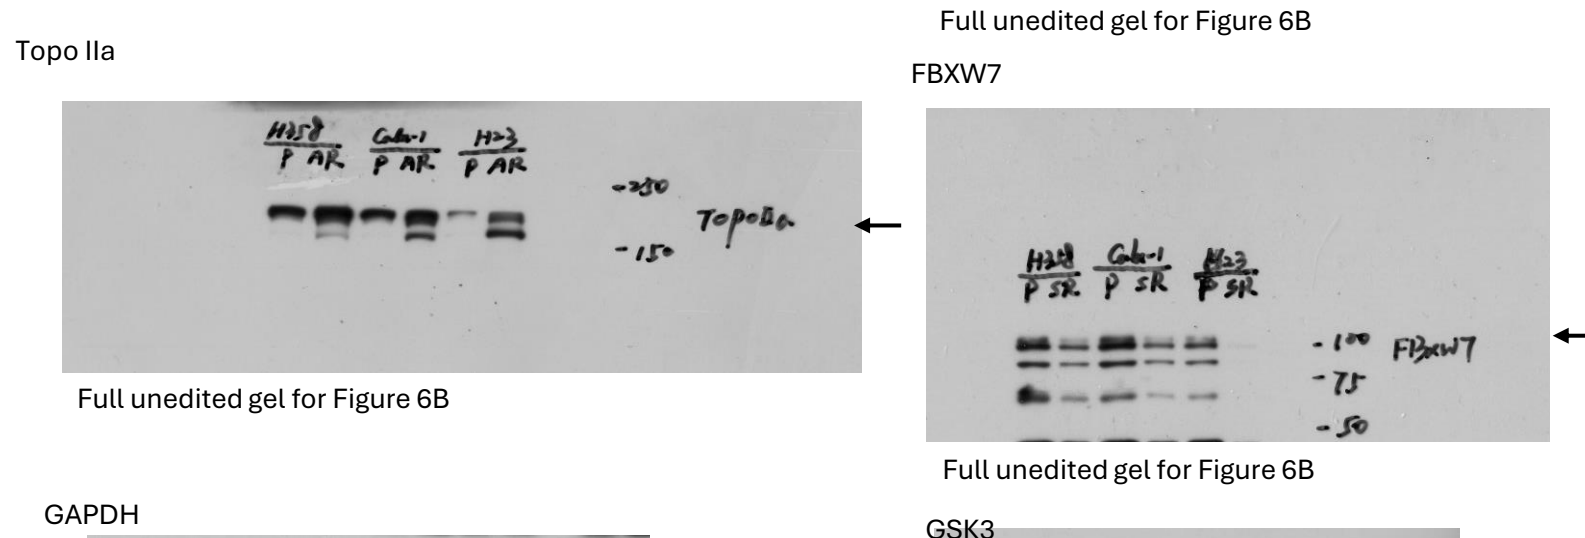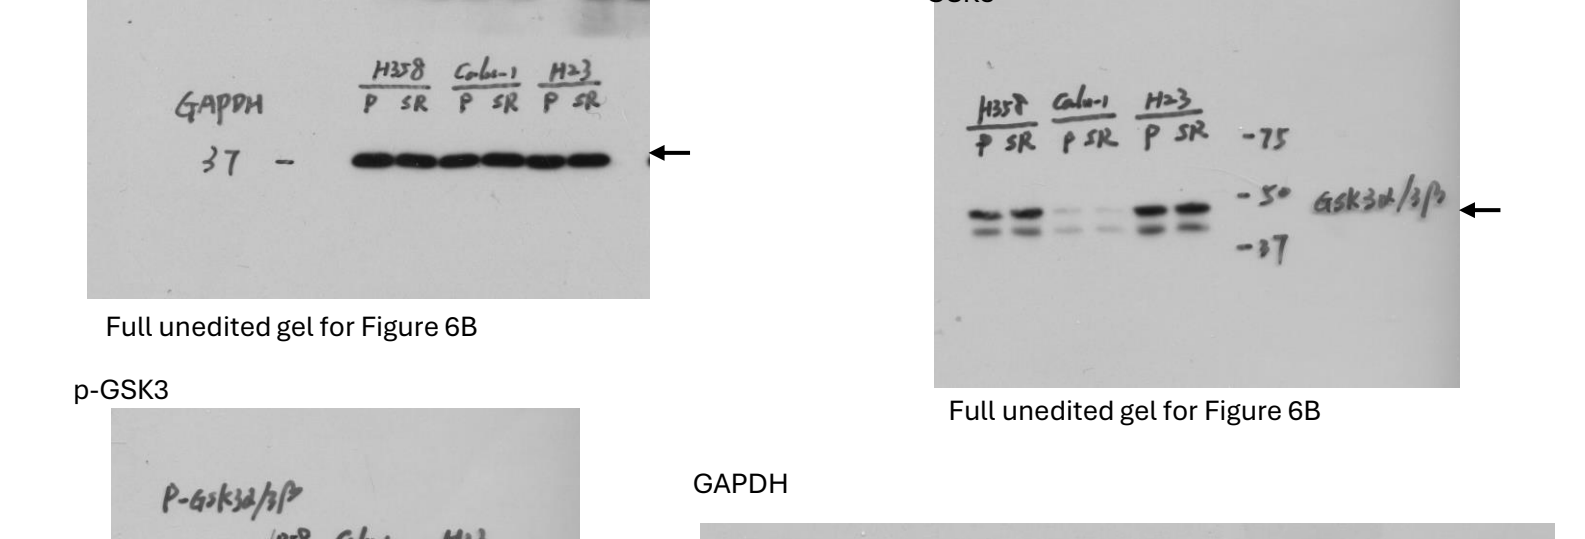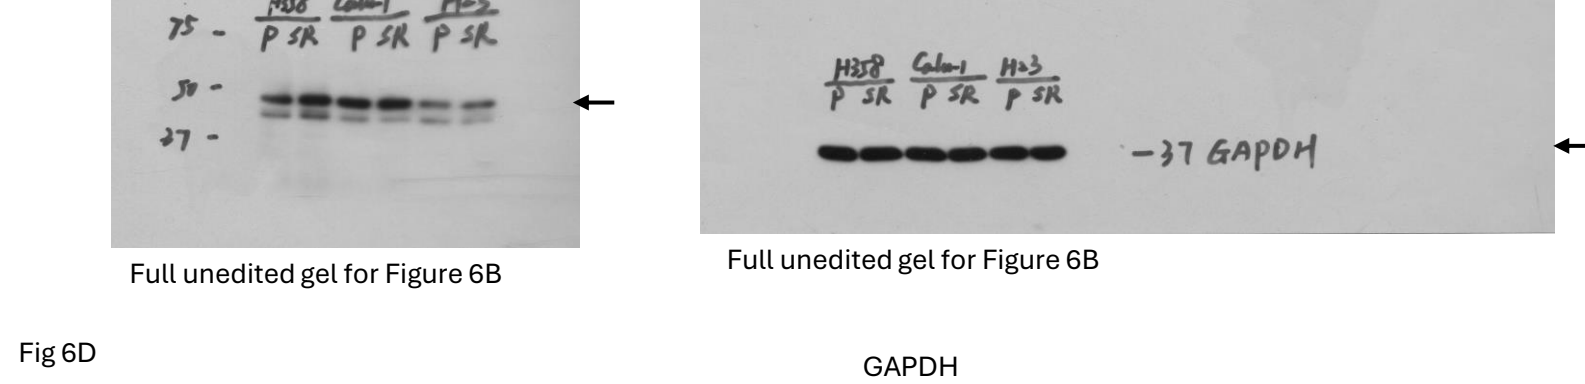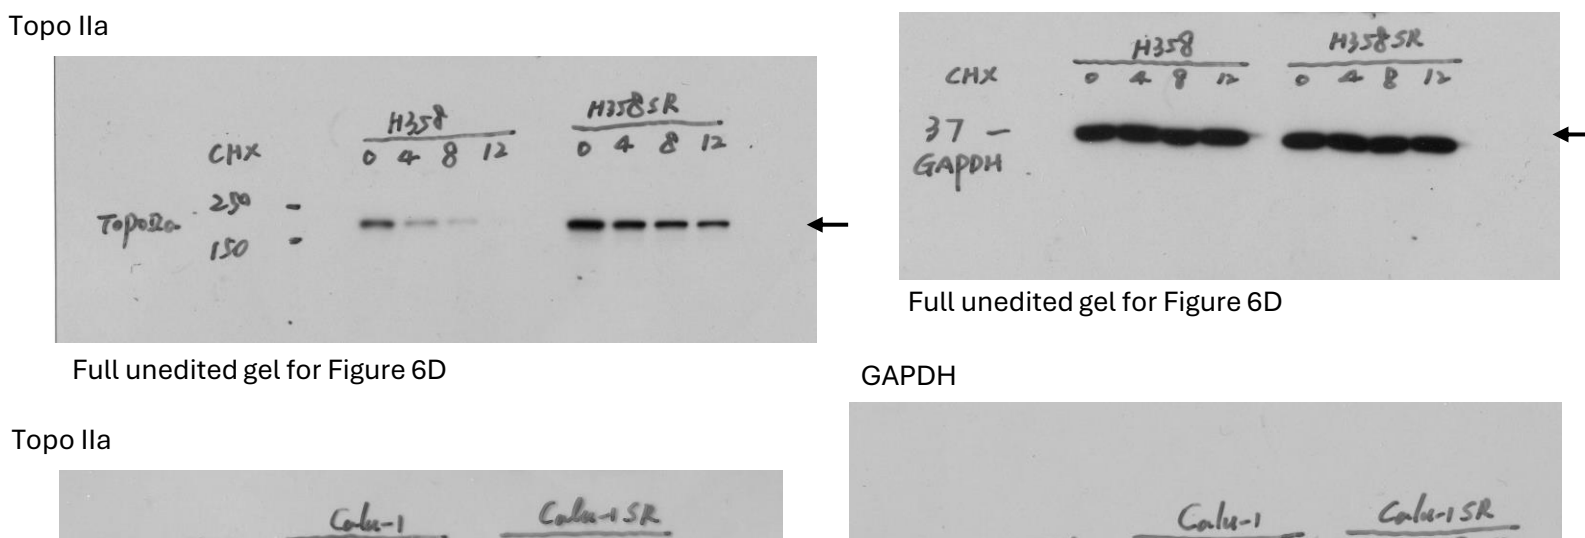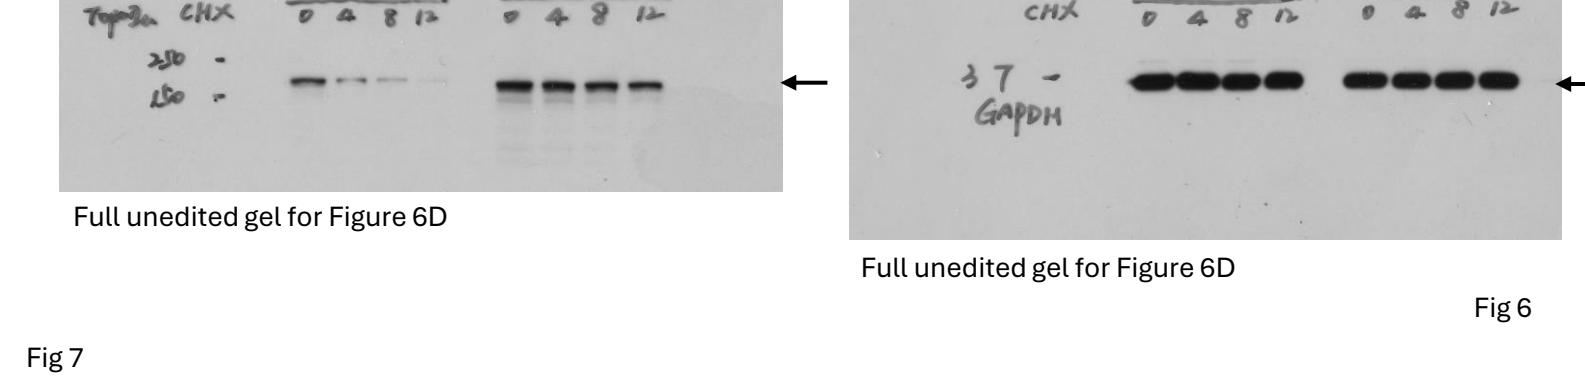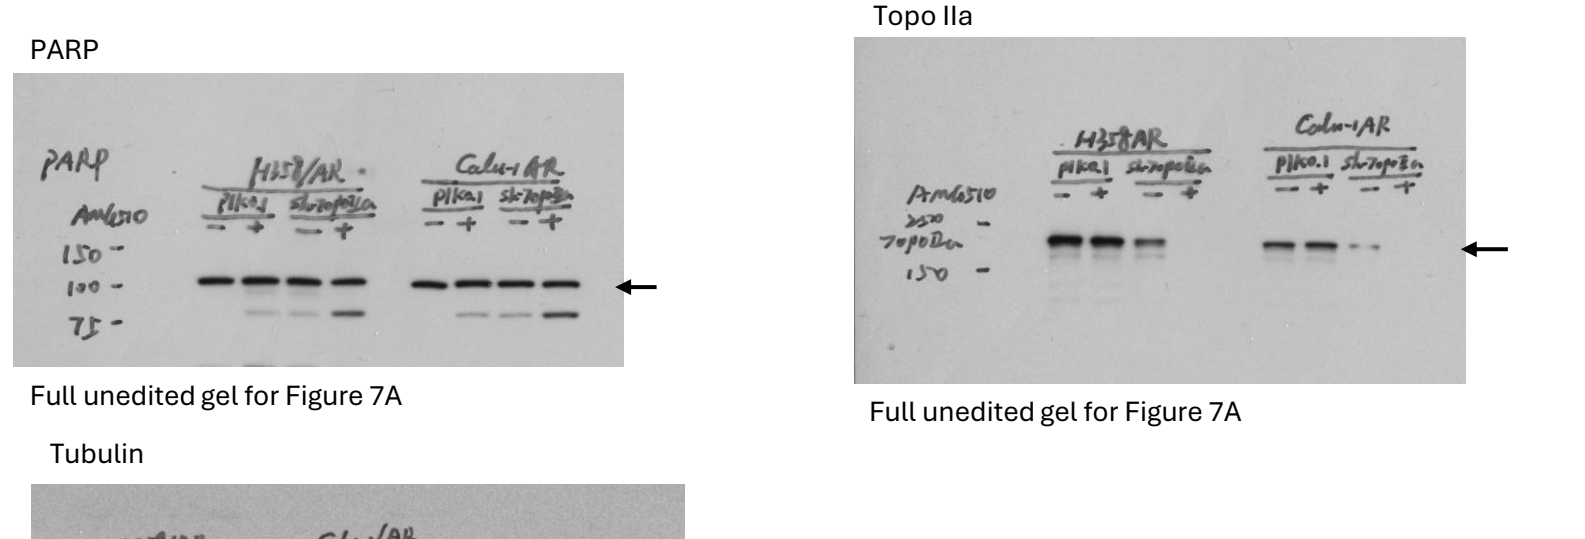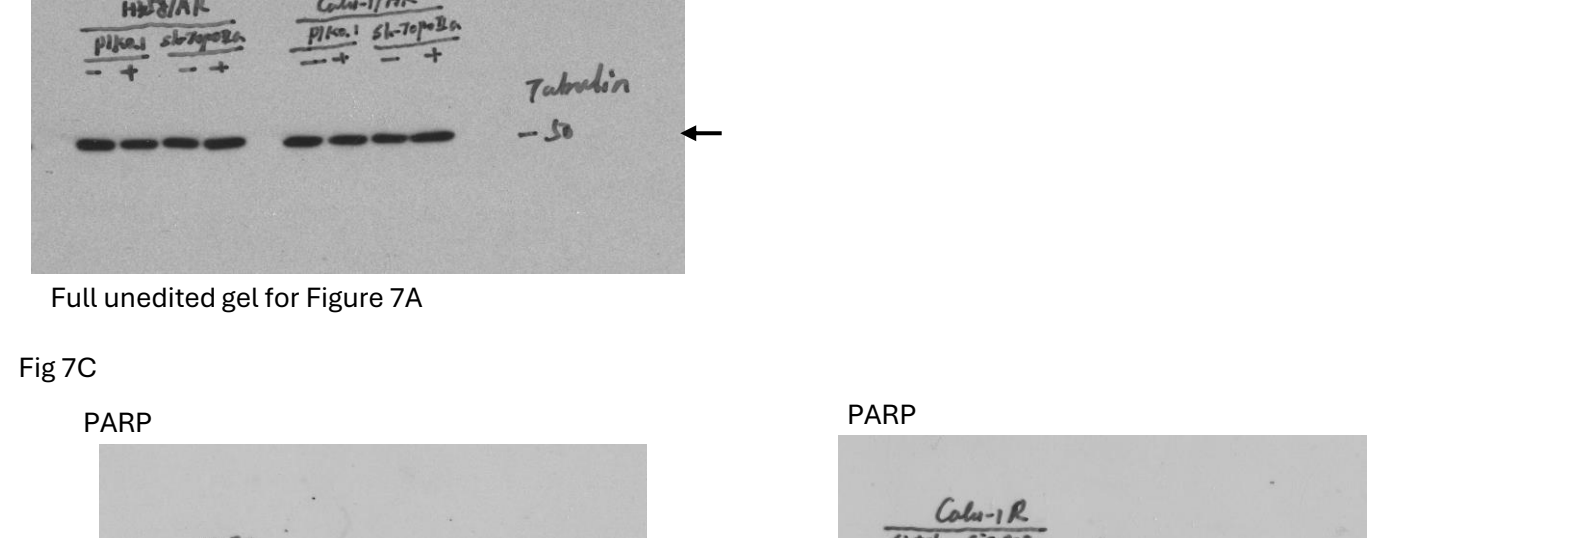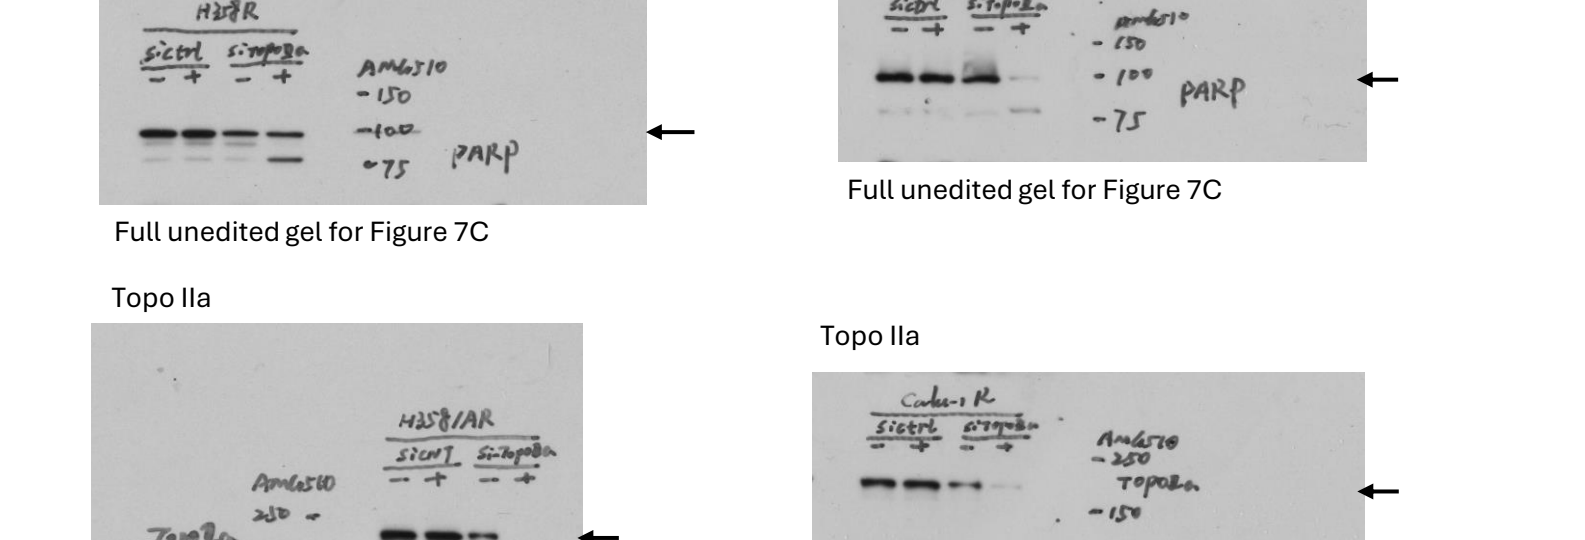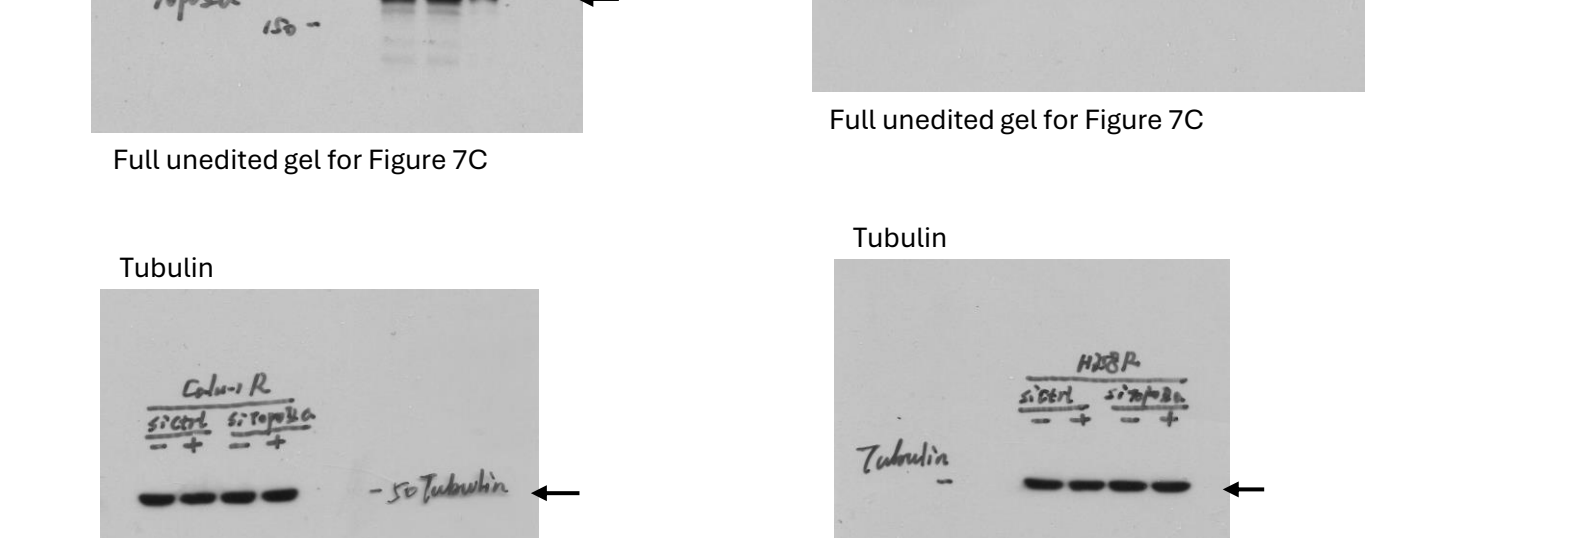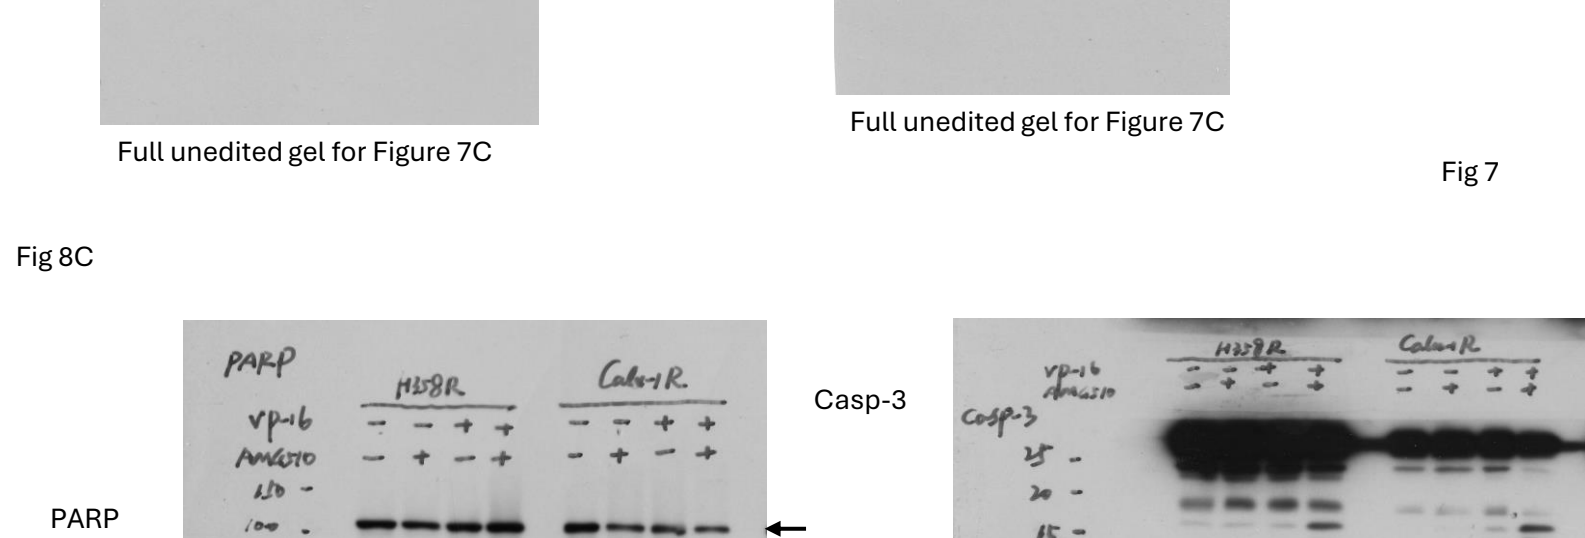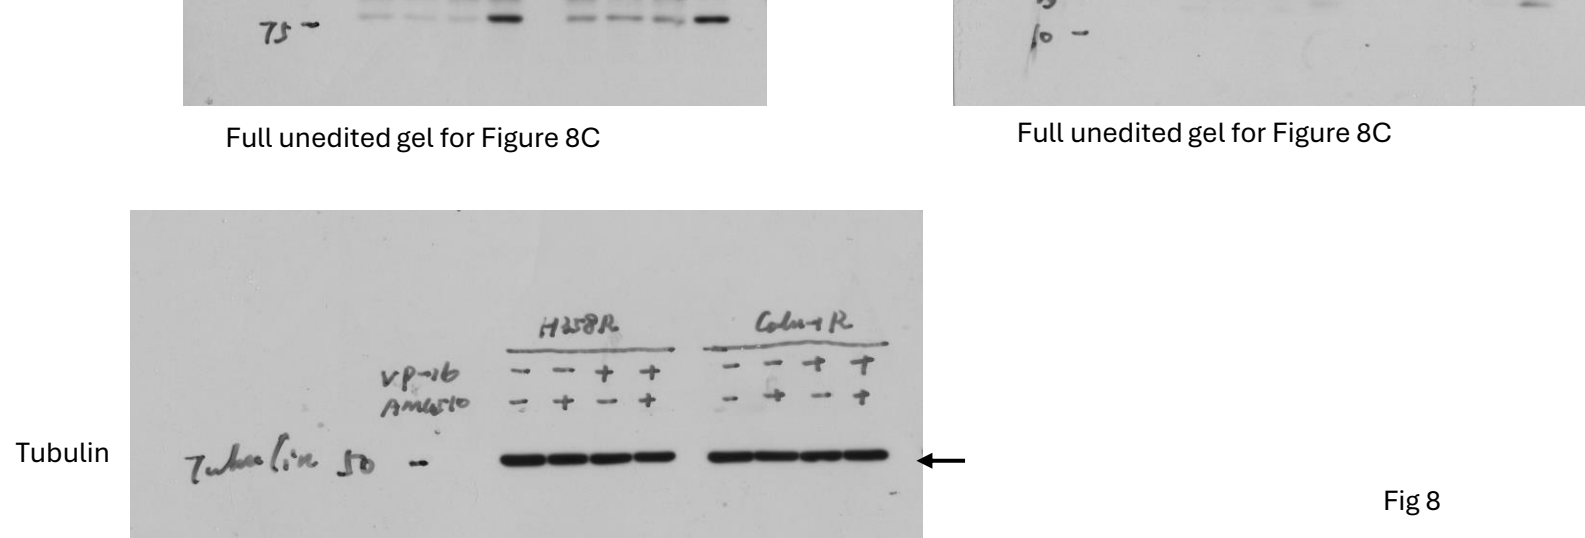

Fig S1 A

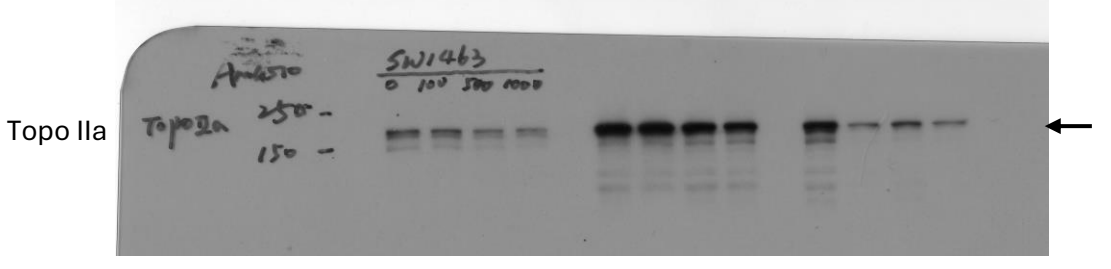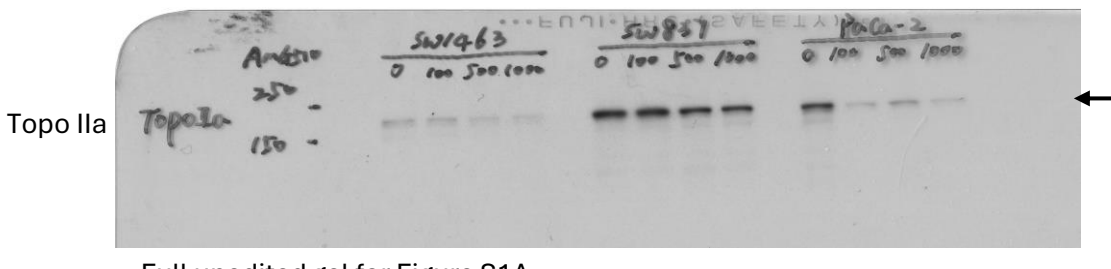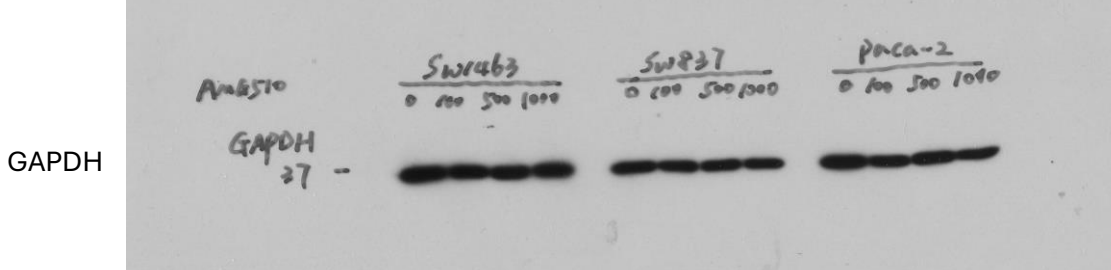

Fig S1 B

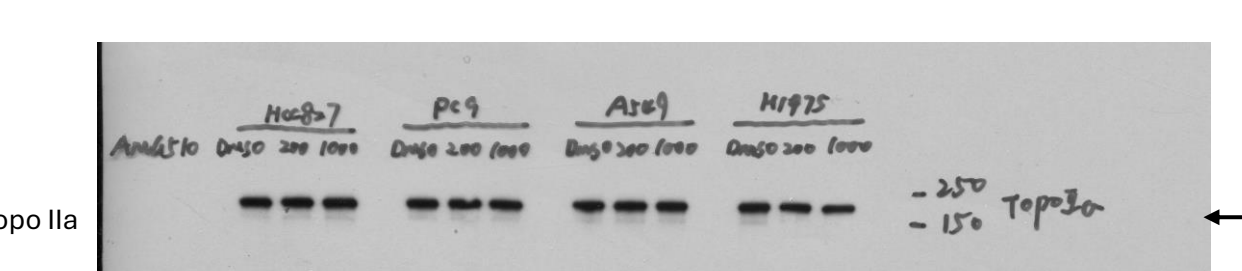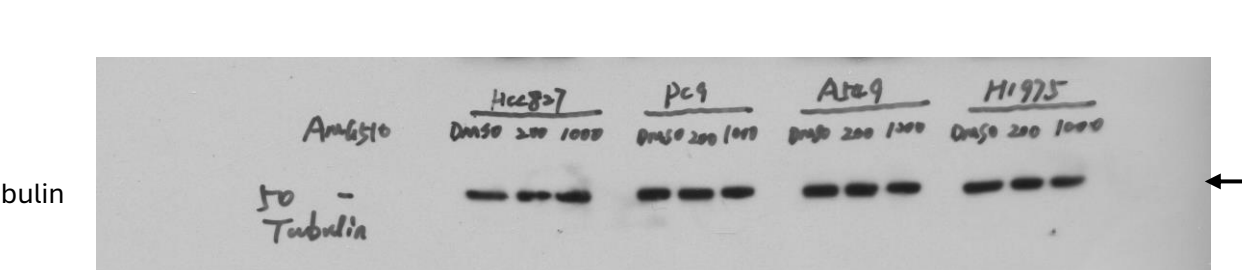

Fig S1

Fig S5 A

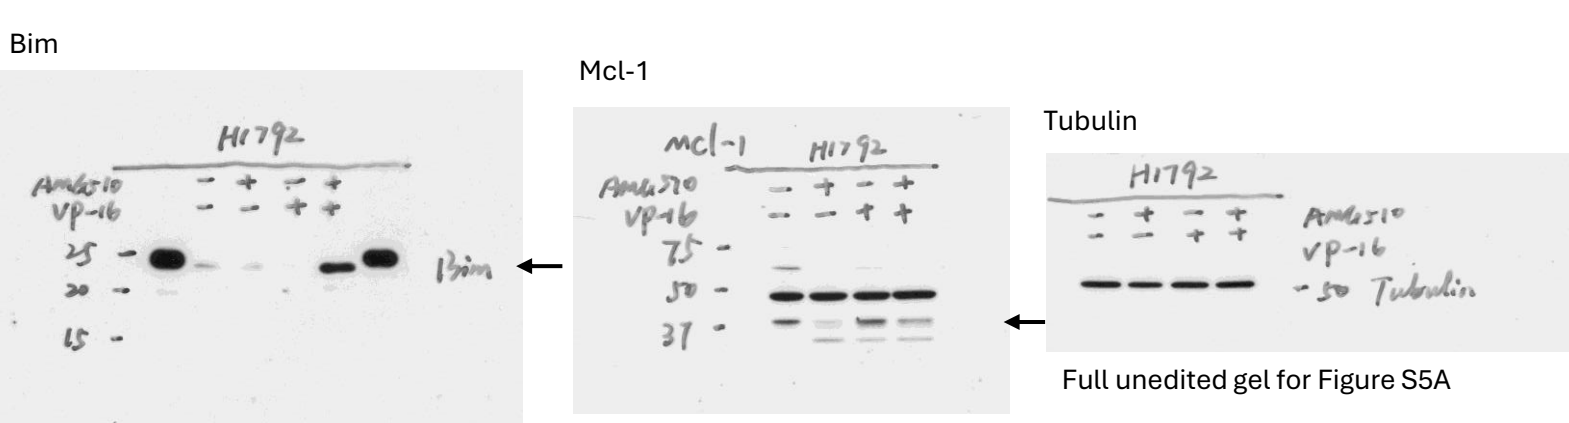

Full unedited gel for Figure S5A

Full unedited gel for Figure S5A

Full unedited gel for Figure S5A

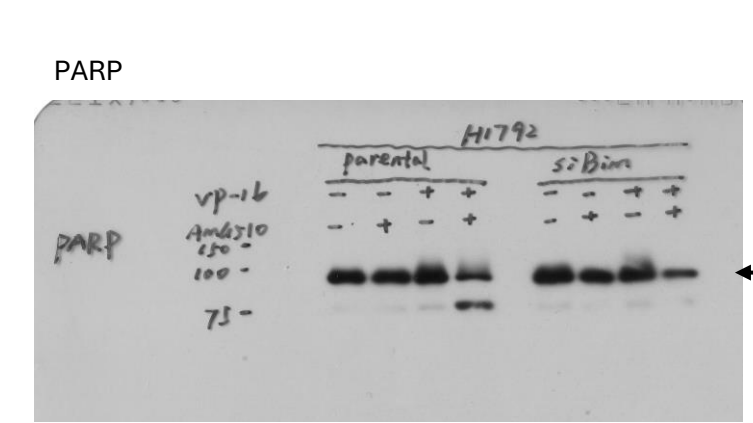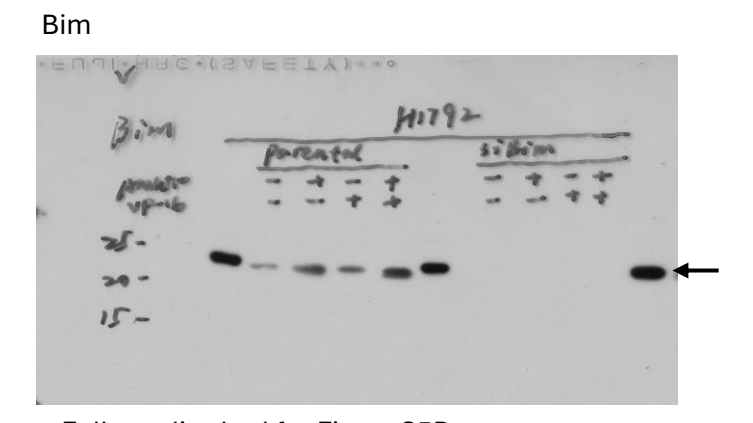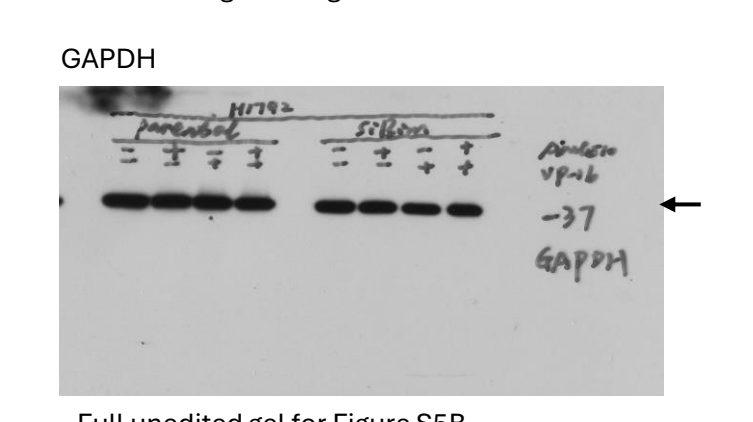

Fig S5

Fig S6 C

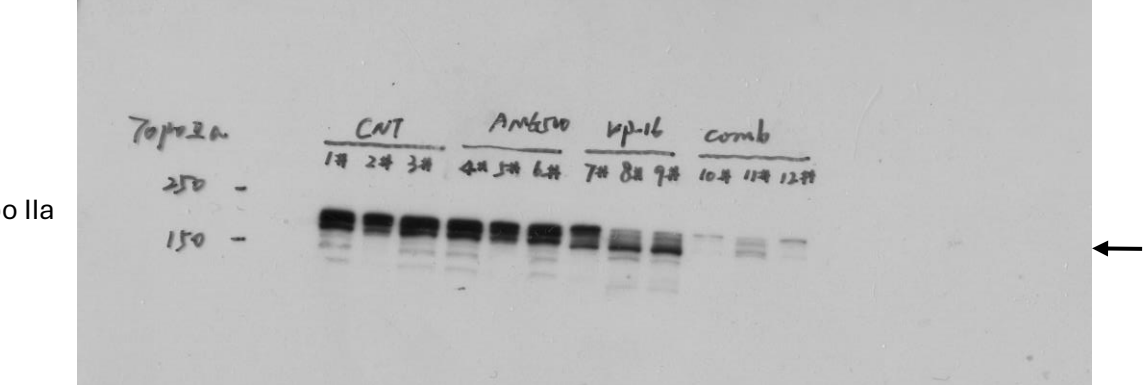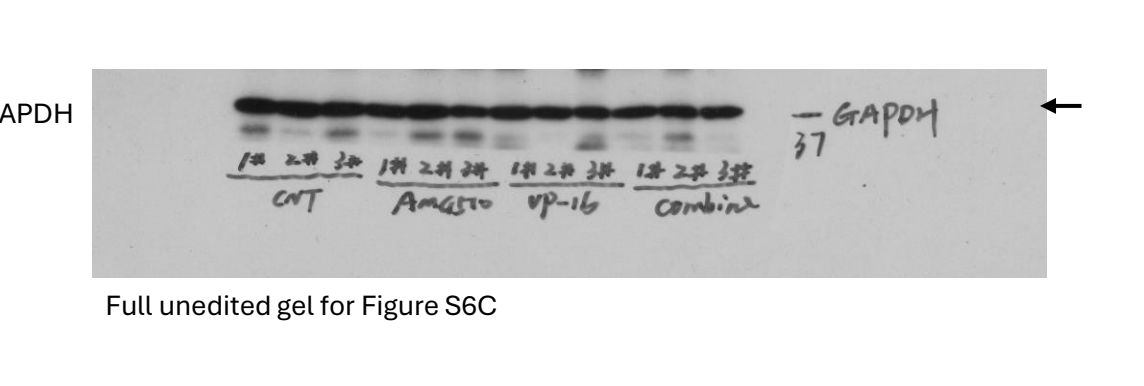

Fig S6

Fig S10 B

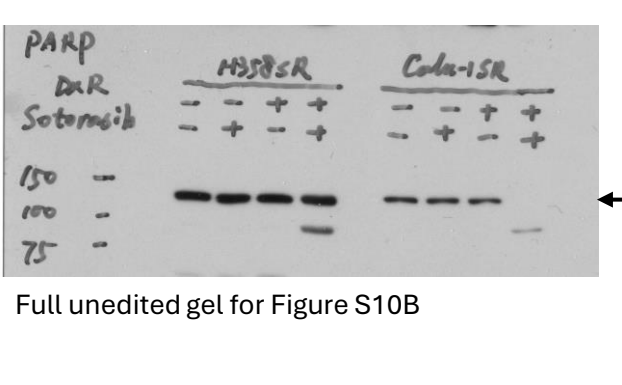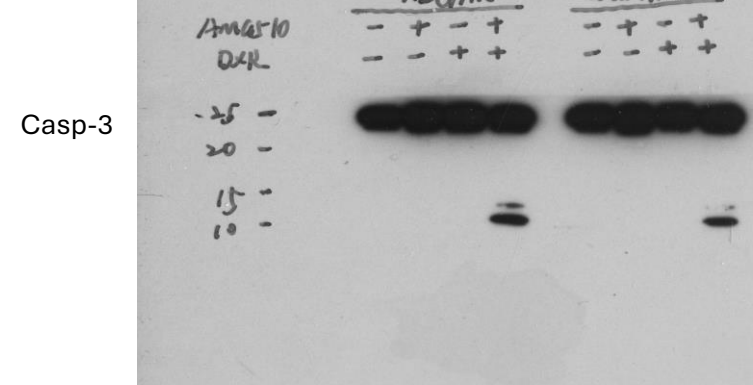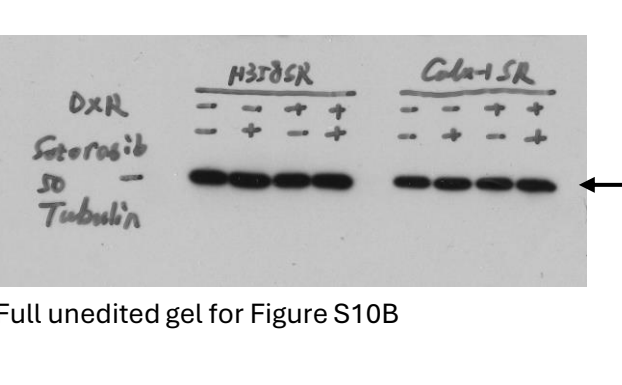

Fig S10
